# Supplementary material for: A kinetic and thermochemical database for organic sulfur and oxygen compounds
Source: Royal Society of Chemistry journal article supplement (doi:10.1039/c4cp05631k), 2015-01-01
Supplement: c4cp05631k2.pdf [file c4cp05631k2.pdf]

Supplementary Material for:

## A kinetic and thermochemical database for organic sulfur and oxygen compounds

### Contents:

- 1) Details of the rate coefficient calculations for reactions with submerged transition states (reactions 21 and 37)
- 2) Tables of the rate parameters computed using CBS-QB3 instead of CCSD(T)-F12
- 3) Tables of computed thermochemical properties of the molecules
- 4) Computed molecular equilibrium geometries and saddle point geometries (B3LYP/CBSB7)

A separate text file contains the NASA-format thermochemistry polynomials for all the molecules.

### 1. Calculation of rate parameters for Reactions 21 and 37

Rate parameters were calculated for the two reactions with submerged transition states using the method described in the main article, and the component rate coefficients are presented in the following tables.  $k_1$  is estimated for the high-pressure limit,  $k_2$  is calculated using transition state theory (with the CCSD(T)-F12 energies),  $K_1$  is calculated using thermochemical parameters calculated using CBS-QB3, and  $k_{-1}$  is calculated using thermodynamic consistency.  $k_{eff}$  provides the effective rate constant calculated at each temperature, while  $k_{fit}$  shows the rate constant obtained using the best-fit modified Arrhenius parameters. The ratio of the fitted rate constants to the rate constants calculated at each temperature show that low fitting error was obtained for temperatures between 400 and 2000 K, but significantly greater error was obtained at 300 K. Thus, the specific  $k_{eff}(300\text{ K})$  should be used at this temperature.

#### Rate parameters for Reaction 21 (Hydrogen Abstraction)

| T    | $k_1$    | $k_{-1}$ | $K_1$    | $k_2$    | $k_{eff}$ | $k_{fit}$ | $k_{fit}/k_{eff}$ |
|------|----------|----------|----------|----------|-----------|-----------|-------------------|
| 300  | 1.00E+13 | 1.27E+11 | 1.27E-02 | 1.89E+10 | 1.30E+12  | 5.58E+12  | 4.30              |
| 400  | 1.00E+13 | 1.69E+10 | 1.69E-03 | 9.28E+10 | 8.46E+12  | 6.81E+12  | 0.81              |
| 500  | 1.00E+13 | 5.36E+09 | 5.36E-04 | 2.42E+11 | 9.78E+12  | 7.68E+12  | 0.79              |
| 600  | 1.00E+13 | 2.58E+09 | 2.58E-04 | 4.62E+11 | 9.94E+12  | 8.34E+12  | 0.84              |
| 800  | 1.00E+13 | 1.11E+09 | 1.11E-04 | 1.05E+12 | 9.99E+12  | 9.25E+12  | 0.93              |
| 1000 | 1.00E+13 | 7.12E+08 | 7.12E-05 | 1.76E+12 | 1.00E+13  | 9.86E+12  | 0.99              |
| 1500 | 1.00E+13 | 4.41E+08 | 4.41E-05 | 3.60E+12 | 1.00E+13  | 1.08E+13  | 1.08              |
| 2000 | 1.00E+13 | 3.80E+08 | 3.80E-05 | 5.26E+12 | 1.00E+13  | 1.13E+13  | 1.13              |

**Rate parameters for Reaction 37 (Radical Addition to Double Bond)**

| T    | $k_1$    | $k_{-1}$ | $K_1$    | $k_2$    | $k_{\text{eff}}$ | $k_{\text{fit}}$ | $k_{\text{fit}}/k_{\text{eff}}$ |
|------|----------|----------|----------|----------|------------------|------------------|---------------------------------|
| 300  | 1.00E+13 | 5.10E+11 | 5.10E-02 | 2.82E+11 | 3.56E+12         | 6.23E+12         | 1.75                            |
| 400  | 1.00E+13 | 7.20E+10 | 7.20E-03 | 3.96E+11 | 8.46E+12         | 7.36E+12         | 0.87                            |
| 500  | 1.00E+13 | 2.33E+10 | 2.33E-03 | 4.93E+11 | 9.55E+12         | 8.13E+12         | 0.85                            |
| 600  | 1.00E+13 | 1.14E+10 | 1.14E-03 | 5.77E+11 | 9.81E+12         | 8.69E+12         | 0.89                            |
| 800  | 1.00E+13 | 4.91E+09 | 4.91E-04 | 7.19E+11 | 9.93E+12         | 9.44E+12         | 0.95                            |
| 1000 | 1.00E+13 | 3.14E+09 | 3.14E-04 | 8.34E+11 | 9.96E+12         | 9.93E+12         | 1.00                            |
| 1500 | 1.00E+13 | 1.96E+09 | 1.96E-04 | 1.04E+12 | 9.98E+12         | 1.06E+13         | 1.06                            |
| 2000 | 1.00E+13 | 1.71E+09 | 1.71E-04 | 1.18E+12 | 9.99E+12         | 1.10E+13         | 1.10                            |

## 2. Rate parameters calculated using CBS-QB3

All rate parameters in the Supplementary Materials were calculated using CBS-QB3.

Units:  $A$  [ $\text{cm}^3/(\text{mol}\cdot\text{s})$  for bimolecular reactions,  $\text{s}^{-1}$  for unimolecular reactions],  $n$  (unitless),  $E_a$  (kJ/mol).

### $\text{H}_2\text{O}$ Addition

| Reaction                                                                                | $T$      | Forward Rate Parameters |      |       | Reverse Rate Parameters |      |       |
|-----------------------------------------------------------------------------------------|----------|-------------------------|------|-------|-------------------------|------|-------|
|                                                                                         |          | $\log_{10}A$            | $n$  | $E_a$ | $\log_{10}A$            | $n$  | $E_a$ |
| 1. 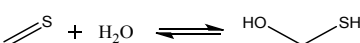    | 300-2000 | -0.63                   | 3.56 | 106.8 | 8.72                    | 1.07 | 167.4 |
| 2.     | 300-2000 | -2.44                   | 3.96 | 106.3 | 8.56                    | 1.12 | 161.3 |
| 3.     | 300-2000 | -2.59                   | 3.95 | 104.3 | 8.93                    | 1.03 | 158.0 |
| 4.     | 300-2000 | -4.31                   | 4.55 | 103.9 | 8.31                    | 1.20 | 158.5 |
| 5.     | 300-2000 | -1.24                   | 3.75 | 126.7 | 0.99                    | 1.33 | 160.4 |
| 6.   | 300-2000 | -1.78                   | 3.90 | 123.1 | 7.75                    | 1.44 | 158.5 |
| 7.   | 400-2000 | -2.53                   | 3.93 | 143.5 | 4.79                    | 2.02 | 151.9 |
| 8.   | 500-2000 | 0.20                    | 3.50 | 172.9 | 11.87                   | 0.33 | 171.2 |
| 9.   | 500-2000 | -0.66                   | 3.70 | 209.9 | 11.91                   | 0.38 | 182.9 |
| 10.  | 600-2000 | -2.8                    | 4.32 | 250.1 | 7.58                    | 1.79 | 220.4 |
| 11.  | 500-2000 | -1.6                    | 4.14 | 250.8 | 8.60                    | 1.63 | 216.5 |

## H<sub>2</sub>S Addition

| Reaction                                                                                | T        | Forward Rate Parameters |      |                | Reverse Rate Parameters |      |                |
|-----------------------------------------------------------------------------------------|----------|-------------------------|------|----------------|-------------------------|------|----------------|
|                                                                                         |          | log <sub>10</sub> A     | n    | E <sub>a</sub> | log <sub>10</sub> A     | n    | E <sub>a</sub> |
| 12. 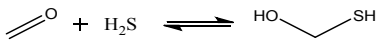   | 300-2000 | 1.09                    | 3.27 | 159.6          | 10.5                    | 0.82 | 210.4          |
| 13.    | 300-2000 | 1.78                    | 2.93 | 155.3          | 12.9                    | 0.13 | 191.4          |
| 14.    | 300-2000 | 1.49                    | 2.96 | 153.6          | 13.4                    | 0.01 | 189.5          |
| 15.    | 300-2000 | 0.22                    | 3.45 | 159.0          | 13.0                    | 0.16 | 187.7          |
| 16.    | 300-2000 | 2.58                    | 2.72 | 151.9          | 12.5                    | 0.20 | 177.7          |
| 17.    | 300-2000 | 2.09                    | 2.83 | 145.1          | 11.6                    | 0.45 | 169.9          |
| 18.    | 300-2000 | -0.69                   | 3.60 | 161.3          | 7.04                    | 1.65 | 124.7          |
| 19.  | 500-2000 | 0.71                    | 3.52 | 190.2          | 11.44                   | 0.59 | 154.8          |

## Hydrogen Abstraction

| Reaction                                                                                | T        | Forward Rate Parameters |      |                | Reverse Rate Parameters |      |                |
|-----------------------------------------------------------------------------------------|----------|-------------------------|------|----------------|-------------------------|------|----------------|
|                                                                                         |          | log <sub>10</sub> A     | n    | E <sub>a</sub> | log <sub>10</sub> A     | n    | E <sub>a</sub> |
| 20. 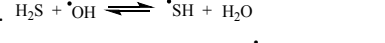 | 300-2000 | 7.76                    | 1.72 | -1.4           | 7.04                    | 2.02 | 112.01         |
| 21.  | 300-2000 | 5.3                     | 2.40 | -7.6           | 2.22                    | 3.56 | 126.20         |
| 22.  | 300-2000 | 4.15                    | 2.49 | 10.6           | 2.82                    | 2.97 | 65.62          |
| 23.  | 300-2000 | 6.12                    | 2.09 | 11.7           | 2.41                    | 3.43 | 87.10          |
| 24.  | 500-2000 | 1.70                    | 3.34 | 67.2           | 2.52                    | 3.21 | 37.62          |
| 25.  | 500-2000 | 1.69                    | 3.27 | 66.2           | -0.03                   | 4.05 | 56.67          |
| 26.  | 300-2000 | 4.44                    | 2.80 | -2.41          | 3.00                    | 2.97 | 5.63           |
| 27.  | 500-2000 | 0.34                    | 3.60 | 29.9           | 0.19                    | 3.76 | 47.89          |
| 28.  | 400-2000 | 1.14                    | 3.41 | 13.7           | 0.40                    | 3.78 | 72.53          |
| 29.  | 300-2000 | 5.79                    | 2.35 | -3.0           | 4.35                    | 2.48 | -2.17          |
| 30.  | 300-2000 | 0.13                    | 3.51 | -5.0           | -2.33                   | 4.58 | 56.23          |

### Radical Addition to Double Bonds

| Reaction | Forward Rate Parameters |                                   |          | Reverse Rate Parameters |                                   |          |                       |
|----------|-------------------------|-----------------------------------|----------|-------------------------|-----------------------------------|----------|-----------------------|
|          | <i>T</i>                | <i>log</i> <sub>10</sub> <i>A</i> | <i>n</i> | <i>E</i> <sub>a</sub>   | <i>log</i> <sub>10</sub> <i>A</i> | <i>n</i> | <i>E</i> <sub>a</sub> |
| 31.      | 300-2000                | 8.45                              | 1.63     | 10.8                    | 7.84                              | 1.83     | 141.0                 |
| 32.      | 300-2000                | 4.36                              | 2.35     | 22.9                    | 10.98                             | 0.99     | 124.1                 |
| 33.      | 300-2000                | 3.08                              | 2.58     | 14.3                    | 12.35                             | 0.55     | 113.7                 |
| 34.      | 300-2000                | 9.30                              | 1.21     | -0.6                    | 10.86                             | 0.46     | 100.8                 |
| 35.      | 300-2000                | 9.92                              | 1.23     | 33.5                    | 9.02                              | 1.33     | 71.9                  |
| 36.      | 300-2000                | 6.91                              | 1.68     | 51.2                    | 11.86                             | 0.59     | 80.1                  |
| 37.      | 300-2000                | 13.08                             | 0.00     | 1.7                     | 12.61                             | 0.14     | 23.7                  |

### Tautomerization

| Reaction | Forward Rate Parameters |                                   |          | Reverse Rate Parameters |                                   |          |                       |
|----------|-------------------------|-----------------------------------|----------|-------------------------|-----------------------------------|----------|-----------------------|
|          | <i>T</i>                | <i>log</i> <sub>10</sub> <i>A</i> | <i>n</i> | <i>E</i> <sub>a</sub>   | <i>log</i> <sub>10</sub> <i>A</i> | <i>n</i> | <i>E</i> <sub>a</sub> |
| 38.      | 300-2000                | 1.18                              | 3.42     | 91.0                    | 0.81                              | 3.34     | 99.8                  |
| 39.      | 300-2000                | 1.49                              | 3.35     | 85.9                    | 1.34                              | 3.17     | 97.9                  |
| 40.      | 300-2000                | 1.49                              | 3.35     | 86.1                    | 1.57                              | 3.13     | 96.6                  |

### 3. Thermochemical Properties Tables

Thermochemical parameters were calculated using CBS-QB3. Enthalpies are presented in units of  $\text{kJ}\cdot\text{mol}^{-1}$ , while the remaining parameters are presented in units of  $\text{J}\cdot\text{mol}^{-1}\cdot\text{K}^{-1}$ .

|                                                                                     | $\Delta H_m(298\text{ K})$ | $S(298\text{ K})$ | $C_p$  |        |        |        |        |        |        |        |        |
|-------------------------------------------------------------------------------------|----------------------------|-------------------|--------|--------|--------|--------|--------|--------|--------|--------|--------|
|                                                                                     |                            |                   | 300 K  | 400 K  | 500 K  | 600 K  | 800 K  | 1000 K | 1500 K | 2000 K | 2400 K |
| $\text{H}_2\text{S}$                                                                | -26.31                     | 205.59            | 34.19  | 35.45  | 37.03  | 38.76  | 42.22  | 45.30  | 50.63  | 53.44  | 54.72  |
|    | -26.82                     | 255.54            | 50.43  | 58.06  | 65.60  | 72.59  | 84.40  | 93.46  | 107.74 | 115.37 | 119.08 |
|    | -52.91                     | 302.57            | 73.81  | 87.41  | 100.10 | 111.56 | 130.53 | 144.87 | 167.19 | 178.92 | 184.56 |
|    | -74.88                     | 340.89            | 97.48  | 116.26 | 134.07 | 150.19 | 176.69 | 196.47 | 226.81 | 242.58 | 250.12 |
|    | 44.25                      | 325.41            | 87.04  | 102.61 | 116.87 | 129.62 | 150.54 | 166.20 | 190.28 | 202.76 | 208.69 |
|    | 111.00                     | 230.69            | 38.45  | 43.20  | 47.86  | 52.07  | 58.95  | 64.02  | 71.73  | 75.80  | 77.80  |
|    | 64.83                      | 273.70            | 58.88  | 69.48  | 79.40  | 88.31  | 102.86 | 113.70 | 130.26 | 138.84 | 142.93 |
|    | 41.84                      | 317.85            | 81.00  | 97.23  | 112.57 | 126.30 | 148.53 | 164.86 | 189.50 | 202.13 | 208.14 |
|    | 19.74                      | 305.35            | 79.64  | 95.27  | 110.34 | 124.01 | 146.47 | 163.15 | 188.54 | 201.63 | 207.86 |
|    | 157.40                     | 287.09            | 72.11  | 88.08  | 102.09 | 113.85 | 131.31 | 142.74 | 157.97 | 165.85 | 169.76 |
|    | 185.42                     | 343.03            | 114.98 | 147.35 | 175.41 | 198.84 | 233.70 | 256.85 | 288.35 | 303.91 | 311.15 |
|   | 111.89                     | 278.57            | 73.41  | 95.08  | 112.97 | 127.26 | 147.75 | 161.27 | 180.41 | 190.28 | 195.18 |
|  | -185.89                    | 292.73            | 77.15  | 88.08  | 96.00  | 101.93 | 110.54 | 117.05 | 129.16 | 136.75 | 140.22 |
|  | -226.10                    | 322.99            | 102.87 | 120.04 | 132.78 | 142.58 | 144.72 | 168.50 | 188.49 | 200.30 | 205.66 |
|  | -247.67                    | 360.90            | 129.63 | 150.72 | 167.18 | 180.79 | 202.74 | 219.85 | 248.31 | 263.80 | 271.01 |
|  | -269.89                    | 350.78            | 129.73 | 152.91 | 170.33 | 184.01 | 204.94 | 220.95 | 248.49 | 264.14 | 271.28 |
|  | -113.75                    | 345.00            | 118.96 | 139.20 | 153.86 | 164.90 | 180.91 | 192.70 | 213.02 | 224.86 | 230.30 |

|                                                                                     | $\Delta H_f^\circ(298\text{ K})$ | $S(298\text{ K})$ | $C_p$  |        |        |        |        |        |        |        |        |
|-------------------------------------------------------------------------------------|----------------------------------|-------------------|--------|--------|--------|--------|--------|--------|--------|--------|--------|
|                                                                                     |                                  |                   | 300 K  | 400 K  | 500 K  | 600 K  | 800 K  | 1000 K | 1500 K | 2000 K | 2400 K |
| 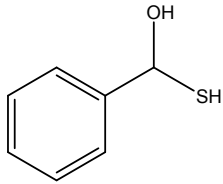   | -86.99                           | 398.69            | 159.40 | 196.79 | 226.36 | 249.81 | 284.13 | 307.88 | 343.75 | 362.61 | 371.37 |
|    | -378.54                          | 328.69            | 88.41  | 100.15 | 109.48 | 117.11 | 128.78 | 137.17 | 150.03 | 156.88 | 160.26 |
|    | -426.47                          | 361.32            | 116.25 | 132.31 | 145.43 | 156.49 | 174.09 | 187.23 | 208.03 | 219.38 | 225.00 |
|    | -450.73                          | 393.78            | 137.83 | 160.28 | 179.23 | 195.38 | 220.90 | 239.60 | 268.28 | 283.39 | 290.73 |
|    | -96.92                           | 326.83            | 105.02 | 130.86 | 152.51 | 170.23 | 196.44 | 214.27 | 240.44 | 254.37 | 261.00 |
|   | -93.86                           | 325.22            | 106.93 | 133.52 | 155.54 | 173.28 | 198.79 | 215.61 | 240.42 | 254.62 | 261.47 |
|  | -132.92                          | 269.68            | 56.32  | 63.77  | 70.05  | 75.32  | 83.46  | 89.20  | 97.25  | 100.62 | 101.79 |
|  | -124.29                          | 260.64            | 49.01  | 58.00  | 66.13  | 73.07  | 83.52  | 90.44  | 99.17  | 102.45 | 103.57 |
|  | -185.29                          | 312.44            | 78.23  | 92.09  | 103.65 | 113.31 | 128.30 | 139.08 | 155.07 | 162.77 | 166.10 |
|  | -175.45                          | 296.90            | 70.07  | 84.29  | 97.43  | 109.02 | 127.34 | 140.25 | 158.05 | 165.83 | 169.01 |
|  | -207.91                          | 346.14            | 105.14 | 122.52 | 137.92 | 151.48 | 173.46 | 189.67 | 213.85 | 225.74 | 231.14 |
|  | -199.29                          | 338.89            | 92.67  | 112.71 | 131.12 | 147.26 | 172.70 | 190.72 | 216.47 | 228.68 | 234.13 |

|                                                                                     | $\Delta H_f^\circ(298\text{ K})$ | $S(298\text{ K})$ | $C_p$  |        |        |        |        |        |        |        |        |
|-------------------------------------------------------------------------------------|----------------------------------|-------------------|--------|--------|--------|--------|--------|--------|--------|--------|--------|
|                                                                                     |                                  |                   | 300 K  | 400 K  | 500 K  | 600 K  | 800 K  | 1000 K | 1500 K | 2000 K | 2400 K |
| 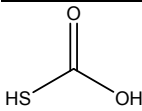   | -379.42                          | 290.84            | 70.25  | 82.58  | 92.47  | 100.15 | 110.49 | 116.41 | 122.33 | 123.80 | 124.15 |
|    | -357.65                          | 279.56            | 71.32  | 84.88  | 95.65  | 103.74 | 113.62 | 118.29 | 122.22 | 124.48 | 125.56 |
|    | -150.44                          | 231.53            | 41.04  | 45.19  | 48.51  | 51.08  | 54.51  | 56.52  | 59.09  | 60.50  | 61.13  |
|    | -199.83                          | 323.88            | 100.56 | 119.48 | 133.64 | 144.26 | 159.03 | 169.37 | 187.63 | 199.46 | 205.17 |
|    | -166.71                          | 327.62            | 98.54  | 113.83 | 126.26 | 136.81 | 154.00 | 167.33 | 189.01 | 200.54 | 205.87 |
|    | -185.28                          | 353.85            | 115.21 | 136.37 | 155.22 | 171.78 | 198.62 | 218.61 | 249.58 | 265.94 | 273.86 |
|    | -144.57                          | 297.81            | 72.53  | 85.83  | 97.67  | 108.04 | 124.76 | 137.06 | 155.23 | 163.84 | 167.52 |
|    | -86.24                           | 294.92            | 66.89  | 80.46  | 93.17  | 104.46 | 122.53 | 135.54 | 154.40 | 163.43 | 167.46 |
|   | -211.47                          | 335.39            | 92.91  | 113.76 | 132.75 | 149.06 | 174.10 | 191.39 | 215.64 | 227.14 | 232.35 |
|  | -156.45                          | 332.77            | 91.43  | 109.38 | 127.03 | 143.33 | 170.18 | 189.71 | 217.30 | 229.56 | 234.62 |
|  | -236.37                          | 382.97            | 117.06 | 142.80 | 166.80 | 187.85 | 220.80 | 243.93 | 276.70 | 292.26 | 299.28 |



|                                                                                     | $\Delta H_{f0}^{\circ}(298\text{ K})$ | $S(298\text{ K})$ | Cp     |        |        |        |        |        |        |        |        |
|-------------------------------------------------------------------------------------|---------------------------------------|-------------------|--------|--------|--------|--------|--------|--------|--------|--------|--------|
|                                                                                     |                                       |                   | 300 K  | 400 K  | 500 K  | 600 K  | 800 K  | 1000 K | 1500 K | 2000 K | 2400 K |
| SH <sup>*</sup>                                                                     | 139.62                                | 192.04            | 29.03  | 29.10  | 29.35  | 29.75  | 30.80  | 31.90  | 34.08  | 35.34  | 35.90  |
|    | 115.62                                | 238.93            | 40.17  | 45.80  | 51.44  | 56.69  | 65.61  | 72.48  | 83.40  | 89.28  | 92.14  |
|    | 122.58                                | 305.71            | 71.22  | 82.63  | 93.42  | 103.13 | 119.00 | 130.78 | 148.78 | 158.11 | 162.57 |
|    | 153.80                                | 306.64            | 77.50  | 92.35  | 105.99 | 118.07 | 137.54 | 151.83 | 173.38 | 184.42 | 189.66 |
|    | 208.47                                | 324.42            | 77.01  | 90.00  | 103.03 | 114.98 | 134.49 | 148.75 | 169.94 | 180.59 | 185.59 |
|    | -38.40                                | 283.93            | 58.01  | 67.81  | 76.28  | 83.35  | 93.88  | 101.01 | 111.57 | 117.75 | 120.89 |
|    | -76.45                                | 314.30            | 83.71  | 99.46  | 112.64 | 123.65 | 140.65 | 152.87 | 171.47 | 181.32 | 186.14 |
|    | -58.61                                | 333.89            | 95.52  | 109.32 | 120.73 | 130.31 | 145.29 | 156.10 | 172.29 | 180.52 | 184.41 |
|    | -99.21                                | 356.87            | 107.82 | 128.96 | 147.34 | 163.05 | 187.63 | 205.29 | 231.67 | 245.19 | 251.67 |
|    | -81.89                                | 368.63            | 118.50 | 139.98 | 156.92 | 170.58 | 191.23 | 206.06 | 229.20 | 241.99 | 248.45 |
|    | -52.02                                | 369.04            | 123.28 | 142.78 | 158.28 | 171.07 | 191.08 | 205.93 | 229.48 | 242.38 | 248.76 |
|    | 28.76                                 | 268.52            | 47.04  | 52.03  | 56.42  | 60.16  | 65.96  | 70.02  | 75.83  | 78.60  | 79.86  |
|   | -31.64                                | 304.74            | 66.73  | 77.97  | 88.00  | 96.65  | 110.20 | 119.90 | 134.21 | 141.42 | 144.82 |
|  | -51.99                                | 345.39            | 92.09  | 106.93 | 121.06 | 133.81 | 154.59 | 169.88 | 192.80 | 204.41 | 209.88 |

## 4. Computed Geometries of the Saddle Points & Molecules

### Z-Matrices for Reaction Transition States

#### Reaction 1 (H<sub>2</sub>O Addition)

```

0 1
C
H      1      B1
S      1      B2 2      A1
H      1      B3 3      A2 2      D1
O      1      B4 3      A3 2      D2
H      5      B5 1      A4 3      D3
H      1      B6 5      A5 3      D4

```

```

B1      1.09017221
B2      1.78421227
B3      2.10766562
B4      1.57202431
B5      1.15450839
B6      1.08707034
A1      117.41379967
A2      103.92142842
A3      97.84146984
A4      82.86264147
A5      103.58888573
D1      87.65439124
D2      113.14359777
D3      1.69897839
D4      -120.24280193

```

#### Reaction 2 (H<sub>2</sub>O Addition)

```

0 1
C
H      1      B1
S      1      B2 2      A1
H      1      B3 3      A2 2      D1
O      1      B4 3      A3 2      D2
H      5      B5 1      A4 3      D3
C      1      B6 5      A5 3      D4
H      7      B7 1      A6 5      D5
H      7      B8 1      A7 5      D6
H      7      B9 1      A8 5      D7

```

```

B1      1.09134866
B2      1.79542051
B3      2.12670833
B4      1.59983409
B5      1.15706391
B6      1.50622240
B7      1.09267319
B8      1.09403545
B9      1.09066297
A1      114.67815208
A2      102.02343744
A3      96.48856122
A4      82.05750160
A5      106.38409353
A6      108.34478150
A7      111.63792524
A8      110.34986003
D1      83.74759670
D2      109.03443995

```

```

D3      2.27957436
D4      -122.92886315
D5      177.66230166
D6      -62.73455333
D7      59.62031099

```

#### Reaction 3 (H<sub>2</sub>O Addition)

```

0 1
C
H      1      B1
S      1      B2 2      A1
H      1      B3 3      A2 2      D1
O      1      B4 3      A3 2      D2
H      5      B5 1      A4 3      D3
C      1      B6 5      A5 3      D4
H      7      B7 1      A6 5      D5
H      7      B8 1      A7 5      D6
C      7      B9 1      A8 5      D7
H      10     B10 7      A9 1      D8
H      10     B11 7      A10 1     D9
H      10     B12 7      A11 1     D10

```

```

B1      1.09241006
B2      1.79658311
B3      2.12327006
B4      1.59671168
B5      1.15532024
B6      1.51209272
B7      1.09654537
B8      1.09297196
B9      1.53242997
B10     1.09220528
B11     1.09168655
B12     1.09424066
A1      114.59448553
A2      102.07345850
A3      96.55246307
A4      82.19312673
A5      106.23520644
A6      108.90981510
A7      108.35071455
A8      111.33938850
A9      110.26078754
A10     110.54686150
A11     111.54751453
D1      84.00842439
D2      109.35927488
D3      2.33201560
D4      -123.24658056
D5      -59.01941864
D6      58.01521388
D7      179.26799570
D8      179.45862584
D9      -60.67338652
D10     59.72805879

```

#### Reaction 4 (H<sub>2</sub>O Addition)

```

0 1
C
H      1      B1
H      2      B2 1      A1

```

|   |    |     |   |     |    |     |
|---|----|-----|---|-----|----|-----|
| H | 2  | B3  | 1 | A2  | 3  | D1  |
| H | 2  | B4  | 1 | A3  | 4  | D2  |
| C | 1  | B5  | 2 | A4  | 3  | D3  |
| H | 6  | B6  | 2 | A5  | 2  | D4  |
| H | 6  | B7  | 1 | A6  | 2  | D5  |
| H | 6  | B8  | 1 | A7  | 2  | D6  |
| H | 1  | B9  | 6 | A8  | 2  | D7  |
| O | 1  | B10 | 6 | A9  | 2  | D8  |
| H | 11 | B11 | 1 | A10 | 6  | D9  |
| S | 1  | B12 | 6 | A11 | 11 | D10 |

B1 1.51645709  
 B2 1.09174552  
 B3 1.09202585  
 B4 1.09556253  
 B5 1.51344540  
 B6 1.09436117  
 B7 1.09250161  
 B8 1.08917737  
 B9 1.84815030  
 B10 1.62342398  
 B11 0.97085608  
 B12 1.81232413  
 A1 111.06292678  
 A2 108.27815756  
 A3 111.89594122  
 A4 114.24038294  
 A5 111.55925655  
 A6 108.40918331  
 A7 110.47764536  
 A8 117.19857465  
 A9 104.01180661  
 A10 108.53901415  
 A11 116.24452023  
 D1 117.32750898  
 D2 118.97844448  
 D3 174.71921852  
 D4 -50.29977559  
 D5 69.46649687  
 D6 -172.47257991  
 D7 155.08030502  
 D8 116.40836204  
 D9 -138.18293074  
 D10 103.23612351

Reaction 5 (H<sub>2</sub>O Addition)

O 1

|   |   |     |   |    |    |
|---|---|-----|---|----|----|
| C |   |     |   |    |    |
| H | 1 | B1  |   |    |    |
| S | 1 | B2  | 2 | A1 |    |
| H | 1 | B3  | 3 | A2 | D1 |
| O | 1 | B4  | 3 | A3 | D2 |
| H | 5 | B5  | 1 | A4 | D3 |
| C | 1 | B6  | 5 | A5 | D4 |
| H | 7 | B7  | 1 | A6 | D5 |
| C | 7 | B8  | 1 | A7 | D6 |
| H | 9 | B9  | 7 | A8 | D7 |
| H | 9 | B10 | 7 | A9 | D8 |

B1 1.09078142  
 B2 1.79865269  
 B3 2.14194386  
 B4 1.60547164  
 B5 1.16487525  
 B6 1.48036433

|     |               |
|-----|---------------|
| B7  | 1.08530346    |
| B8  | 1.33120582    |
| B9  | 1.08565011    |
| B10 | 1.08342230    |
| A1  | 115.05186072  |
| A2  | 104.16716637  |
| A3  | 95.68790466   |
| A4  | 82.26163300   |
| A5  | 107.28147536  |
| A6  | 115.52921217  |
| A7  | 122.83447466  |
| A8  | 121.73926623  |
| A9  | 121.47530880  |
| D1  | 85.21272811   |
| D2  | 109.37004587  |
| D3  | -1.29309548   |
| D4  | -122.13382908 |
| D5  | 61.48411045   |
| D6  | -122.48015823 |
| D7  | 2.54182009    |
| D8  | -175.88078465 |

Reaction 6 (H<sub>2</sub>O Addition)

O 1

|   |    |     |    |     |     |
|---|----|-----|----|-----|-----|
| C |    |     |    |     |     |
| C | 1  | B1  |    |     |     |
| C | 2  | B2  | 1  | A1  |     |
| C | 3  | B3  | 2  | A2  | D1  |
| C | 4  | B4  | 3  | A3  | D2  |
| C | 5  | B5  | 4  | A4  | D3  |
| H | 1  | B6  | 2  | A5  | D4  |
| H | 2  | B7  | 1  | A6  | D5  |
| H | 3  | B8  | 2  | A7  | D6  |
| H | 5  | B9  | 4  | A8  | D7  |
| H | 6  | B10 | 5  | A9  | D8  |
| C | 4  | B11 | 3  | A10 | D9  |
| H | 12 | B12 | 4  | A11 | D10 |
| S | 12 | B13 | 4  | A12 | D11 |
| O | 12 | B14 | 4  | A13 | D12 |
| H | 15 | B15 | 12 | A14 | D13 |
| H | 15 | B16 | 12 | A15 | D14 |

B1 1.39242070  
 B2 1.39249311  
 B3 1.39873197  
 B4 1.39860331  
 B5 1.38965698  
 B6 1.08424430  
 B7 1.08403460  
 B8 1.08573194  
 B9 1.08313936  
 B10 1.08411689  
 B11 1.49423944  
 B12 1.09028348  
 B13 1.79828556  
 B14 1.61739360  
 B15 1.17561394  
 B16 0.97153264  
 A1 119.80845608  
 A2 120.59719482  
 A3 119.22890460  
 A4 120.17006798  
 A5 120.04263380  
 A6 120.23539897  
 A7 119.75446152

A8 118.88745778  
 A9 119.74215418  
 A10 119.12504538  
 A11 111.26037646  
 A12 121.68130130  
 A13 107.96795048  
 A14 81.58289588  
 A15 109.91378487  
 D1 -0.43102031  
 D2 -0.13282595  
 D3 0.71510654  
 D4 179.97480680  
 D5 -179.43051088  
 D6 -179.92397736  
 D7 -178.24335556  
 D8 179.93056774  
 D9 179.83085613  
 D10 10.79661499  
 D11 149.65212200  
 D12 -102.11373971  
 D13 -127.68003888  
 D14 122.66994456

Reaction 8 (H<sub>2</sub>O Addition)

O 1  
 O  
 C 1 B1  
 S 2 B2 1 A1  
 H 3 B3 2 A2 1 D1  
 O 2 B4 1 A3 3 D2  
 H 5 B5 2 A4 1 D3

B1 1.17191997  
 B2 1.71475143  
 B3 1.64450012  
 B4 1.61682062  
 B5 0.97144213  
 A1 143.87237283  
 A2 66.15992574  
 A3 119.33921613  
 A4 111.50060975  
 D1 174.59101077  
 D2 179.17272137  
 D3 -54.37793466

Reaction 7 (H<sub>2</sub>O Addition)

O 1  
 C  
 C 1 B1  
 H 2 B2 1 A1  
 H 2 B3 1 A2 3 D1  
 H 2 B4 1 A3 3 D2  
 O 1 B5 2 A4 5 D3  
 H 6 B6 1 A5 2 D4  
 S 1 B7 6 A6 2 D5  
 H 1 B8 6 A7 2 D6  
 O 1 B9 6 A8 2 D7  
 H 10 B10 1 A9 6 D8

Reaction 8 (H<sub>2</sub>O Addition)

O 1  
 C  
 S 1 B1  
 O 1 B2 2 A1  
 H 3 B3 1 A2 2 D1  
 O 1 B4 3 A3 2 D2  
 H 5 B5 1 A4 3 D3

B1 1.60125438  
 B2 1.25451279  
 B3 1.25617409  
 B4 1.64141675  
 B5 0.96844971  
 A1 143.91265748  
 A2 81.08325874  
 A3 93.42604067  
 A4 112.09596803  
 D1 -176.27146736  
 D2 -179.77554394  
 D3 -119.72158327

B1 1.51060678  
 B2 1.09208388  
 B3 1.09623366  
 B4 1.08756516  
 B5 1.36698555  
 B6 0.96713169  
 B7 1.79537711  
 B8 2.12601341  
 B9 1.66613069  
 B10 1.19989784  
 A1 108.30095172  
 A2 111.20327611  
 A3 110.54145008  
 A4 114.37433702  
 A5 109.20373029  
 A6 114.85054214  
 A7 81.29559583  
 A8 106.65854425  
 A9 78.86291215  
 D1 120.14102435  
 D2 -118.75861990  
 D3 169.93614413  
 D4 -23.23994867  
 D5 -142.40633694  
 D6 121.22054211  
 D7 114.31226953  
 D8 119.23164284

Reaction 9 (H<sub>2</sub>O Addition)

O 1  
 O  
 C 1 B1  
 S 2 B2 1 A1  
 H 3 B3 2 A2 1 D1  
 O 2 B4 1 A3 3 D2  
 H 5 B5 2 A4 1 D3

B1 1.16161333  
 B2 2.31115069  
 B3 1.34598659  
 B4 1.24876178  
 B5 1.21730164  
 A1 122.77946511  
 A2 92.32819014  
 A3 147.41493079  
 A4 91.42671239  
 D1 85.96673118

D2 -179.64576783  
D3 -179.66288293

Reaction 10 (H<sub>2</sub>O Addition)

O 1  
C  
C 1 B1  
C 2 B2 1 A1  
C 3 B3 2 A2 1 D1  
S 1 B4 2 A3 3 D2  
H 1 B5 2 A4 3 D3  
H 2 B6 1 A5 5 D4  
H 3 B7 2 A6 1 D5  
H 4 B8 3 A7 2 D6  
O 1 B9 2 A8 3 D7  
H 10 B10 1 A9 2 D8  
H 10 B11 1 A10 2 D9

B1 1.46181898  
B2 1.46015815  
B3 1.34477022  
B4 1.73790453  
B5 1.07906490  
B6 1.08604021  
B7 1.08314159  
B8 1.07908017  
B9 1.91246862  
B10 0.96938809  
B11 1.32286184  
A1 109.69957096  
A2 114.93080097  
A3 111.27816270  
A4 125.29914585  
A5 119.13761225  
A6 122.27509585  
A7 129.08823966  
A8 89.52387383  
A9 111.48081220  
A10 63.93677881  
D1 1.31313110  
D2 2.03997675  
D3 154.45150183  
D4 -143.37425032  
D5 177.79403673  
D6 174.36570624  
D7 -111.58751100  
D8 109.64385961  
D9 3.01309568

Reaction 11 (H<sub>2</sub>O Addition)

O 1  
C  
C 1 B1  
C 2 B2 1 A1  
C 3 B3 2 A2 1 D1  
S 1 B4 2 A3 3 D2  
H 1 B5 2 A4 3 D3  
H 2 B6 1 A5 5 D4  
H 3 B7 2 A6 1 D5  
H 4 B8 3 A7 2 D6  
O 3 B9 2 A8 1 D7  
H 10 B10 3 A9 2 D8  
H 4 B11 3 A10 2 D9

B1 1.36679654  
B2 1.41961460  
B3 1.45795706  
B4 1.71835951  
B5 1.08180541  
B6 1.08129894  
B7 1.07883597  
B8 1.08526562  
B9 2.06569549  
B10 0.96844066  
B11 1.26194395  
A1 112.74425826  
A2 113.03444774  
A3 114.62748153  
A4 126.21124849  
A5 123.52628789  
A6 123.43613671  
A7 120.39574359  
A8 111.58056836  
A9 124.36752276  
A10 85.88905227  
D1 0.68624824  
D2 1.69774083  
D3 -176.93490576  
D4 -179.56023536  
D5 -164.89762285  
D6 -136.76051575  
D7 93.51777423  
D8 4.14413208  
D9 107.89007128

Reaction 12 (H<sub>2</sub>S Addition)

O 1  
C  
H 1 B1  
H 1 B2 2 A1  
S 1 B3 3 A2 2 D1  
H 1 B4 4 A3 3 D2  
O 1 B5 4 A4 5 D3  
H 4 B6 1 A5 6 D4

B1 1.08969160  
B2 1.08158277  
B3 2.72782771  
B4 1.81723435  
B5 1.27225209  
B6 1.34534178  
A1 119.59886546  
A2 71.44720185  
A3 44.27884888  
A4 77.79311639  
A5 89.28049073  
D1 129.44192593  
D2 -115.20049569  
D3 -15.17264646  
D4 72.87591482

Reaction 13 (H<sub>2</sub>S Addition)

O 1  
C  
H 1 B1  
S 2 B2 1 A1  
H 1 B3 3 A2 2 D1  
O 1 B4 3 A3 2 D2

|   |   |      |      |    |
|---|---|------|------|----|
| H | 3 | B5 2 | A4 1 | D3 |
| C | 1 | B6 5 | A5 3 | D4 |
| H | 7 | B7 1 | A6 5 | D5 |
| H | 7 | B8 1 | A7 5 | D6 |
| H | 7 | B9 1 | A8 5 | D7 |

|    |               |
|----|---------------|
| B1 | 1.08207438    |
| B2 | 2.57783332    |
| B3 | 1.81778015    |
| B4 | 1.28222502    |
| B5 | 1.34561337    |
| B6 | 1.47745109    |
| B7 | 1.09277643    |
| B8 | 1.08893567    |
| B9 | 1.09839600    |
| A1 | 88.10031074   |
| A2 | 46.11917006   |
| A3 | 78.22584260   |
| A4 | 112.04740588  |
| A5 | 119.60992962  |
| A6 | 109.72974081  |
| A7 | 111.40474012  |
| A8 | 108.86128785  |
| D1 | -113.72635989 |
| D2 | -128.53515484 |
| D3 | 22.12735050   |
| D4 | 134.38770233  |
| D5 | -140.86809741 |
| D6 | -18.12246775  |
| D7 | 102.76938697  |

Reaction 14 (H<sub>2</sub>S Addition)

|     |    |       |       |     |
|-----|----|-------|-------|-----|
| 0 1 |    |       |       |     |
| C   |    |       |       |     |
| H   | 1  | B1    |       |     |
| S   | 2  | B2 1  | A1    |     |
| H   | 1  | B3 3  | A2 2  | D1  |
| O   | 1  | B4 3  | A3 2  | D2  |
| H   | 3  | B5 2  | A4 1  | D3  |
| C   | 1  | B6 5  | A5 3  | D4  |
| H   | 7  | B7 1  | A6 5  | D5  |
| H   | 7  | B8 1  | A7 5  | D6  |
| C   | 7  | B9 1  | A8 5  | D7  |
| H   | 10 | B10 7 | A9 1  | D8  |
| H   | 10 | B11 7 | A10 1 | D9  |
| H   | 10 | B12 7 | A11 1 | D10 |

|     |              |
|-----|--------------|
| B1  | 1.08263566   |
| B2  | 2.58419939   |
| B3  | 1.81750188   |
| B4  | 1.28309019   |
| B5  | 1.34560587   |
| B6  | 1.48152946   |
| B7  | 1.10267814   |
| B8  | 1.09595158   |
| B9  | 1.52767534   |
| B10 | 1.09072160   |
| B11 | 1.09136697   |
| B12 | 1.09172499   |
| A1  | 87.63527427  |
| A2  | 46.23955852  |
| A3  | 78.32047736  |
| A4  | 112.93879552 |
| A5  | 120.16257597 |
| A6  | 105.86882580 |

|     |               |
|-----|---------------|
| A7  | 106.87857733  |
| A8  | 115.68609744  |
| A9  | 111.25641026  |
| A10 | 110.11418597  |
| A11 | 110.80784736  |
| D1  | -113.31573096 |
| D2  | -128.09409136 |
| D3  | 21.36069627   |
| D4  | 134.07509410  |
| D5  | 104.74702722  |
| D6  | -144.37231026 |
| D7  | -18.84596679  |
| D8  | 58.83587233   |
| D9  | 179.08327593  |
| D10 | -61.16090483  |

Reaction 15 (H<sub>2</sub>S Addition)

|     |    |        |       |     |
|-----|----|--------|-------|-----|
| 0 1 |    |        |       |     |
| C   |    |        |       |     |
| H   | 1  | B1     |       |     |
| H   | 1  | B2 2   | A1    |     |
| H   | 1  | B3 2   | A2 3  | D1  |
| C   | 1  | B4 4   | A3 3  | D2  |
| C   | 5  | B5 1   | A4 4  | D3  |
| H   | 6  | B6 5   | A5 1  | D4  |
| H   | 6  | B7 5   | A6 1  | D5  |
| H   | 6  | B8 5   | A7 1  | D6  |
| O   | 5  | B9 1   | A8 6  | D7  |
| H   | 10 | B10 5  | A9 1  | D8  |
| S   | 10 | B11 5  | A10 1 | D9  |
| H   | 12 | B12 10 | A11 5 | D10 |

|     |               |
|-----|---------------|
| B1  | 1.08871620    |
| B2  | 1.10282556    |
| B3  | 1.08650026    |
| B4  | 1.49386005    |
| B5  | 1.48943356    |
| B6  | 1.08862981    |
| B7  | 1.08999815    |
| B8  | 1.09920820    |
| B9  | 1.28993680    |
| B10 | 1.06142789    |
| B11 | 2.73250815    |
| B12 | 1.34604967    |
| A1  | 107.78989122  |
| A2  | 110.33004286  |
| A3  | 111.79951531  |
| A4  | 119.31437751  |
| A5  | 110.39692426  |
| A6  | 111.39720920  |
| A7  | 108.27586628  |
| A8  | 121.27146952  |
| A9  | 102.99695157  |
| A10 | 78.40316862   |
| A11 | 121.50766783  |
| D1  | 118.44193043  |
| D2  | 116.95719952  |
| D3  | 174.35609944  |
| D4  | -165.02339533 |
| D5  | -41.56012878  |
| D6  | 76.66707489   |
| D7  | 160.49693221  |
| D8  | 60.80414988   |
| D9  | 83.87754436   |
| D10 | -78.11837068  |

Reaction 16 (H<sub>2</sub>S Addition)

|   |   |     |   |    |   |    |
|---|---|-----|---|----|---|----|
| O | 1 |     |   |    |   |    |
| C |   |     |   |    |   |    |
| S | 1 | B1  |   |    |   |    |
| H | 2 | B2  | 1 | A1 |   |    |
| H | 1 | B3  | 2 | A2 | 3 | D1 |
| H | 1 | B4  | 2 | A3 | 3 | D2 |
| O | 1 | B5  | 2 | A4 | 3 | D3 |
| C | 1 | B6  | 6 | A5 | 2 | D4 |
| H | 7 | B7  | 1 | A6 | 6 | D5 |
| C | 7 | B8  | 1 | A7 | 6 | D6 |
| H | 9 | B9  | 7 | A8 | 1 | D7 |
| H | 9 | B10 | 7 | A9 | 1 | D8 |

|     |               |
|-----|---------------|
| B1  | 2.80957852    |
| B2  | 1.34557404    |
| B3  | 1.08168206    |
| B4  | 1.82662576    |
| B5  | 1.29462894    |
| B6  | 1.43370938    |
| B7  | 1.08483581    |
| B8  | 1.34318959    |
| B9  | 1.08491292    |
| B10 | 1.08290748    |
| A1  | 89.02384163   |
| A2  | 68.64251991   |
| A3  | 47.01191812   |
| A4  | 78.04367645   |
| A5  | 119.18841243  |
| A6  | 116.80966450  |
| A7  | 121.41733935  |
| A8  | 121.40438694  |
| A9  | 121.54869228  |
| D1  | 157.19643507  |
| D2  | -87.86782341  |
| D3  | -73.72861180  |
| D4  | -133.62919208 |
| D5  | 7.90681073    |
| D6  | -171.92589798 |
| D7  | -1.24184038   |
| D8  | 179.67861776  |

Reaction 17 (H<sub>2</sub>S Addition)

|   |   |     |   |    |   |    |
|---|---|-----|---|----|---|----|
| O | 1 |     |   |    |   |    |
| C |   |     |   |    |   |    |
| S | 1 | B1  |   |    |   |    |
| H | 2 | B2  | 1 | A1 |   |    |
| H | 1 | B3  | 2 | A2 | 3 | D1 |
| H | 1 | B4  | 2 | A3 | 3 | D2 |
| O | 1 | B5  | 2 | A4 | 3 | D3 |
| C | 1 | B6  | 6 | A5 | 2 | D4 |
| H | 7 | B7  | 1 | A6 | 6 | D5 |
| C | 7 | B8  | 1 | A7 | 6 | D6 |
| H | 9 | B9  | 7 | A8 | 1 | D7 |
| H | 9 | B10 | 7 | A9 | 1 | D8 |

|    |            |
|----|------------|
| B1 | 2.80957852 |
| B2 | 1.34557404 |
| B3 | 1.08168206 |
| B4 | 1.82662576 |
| B5 | 1.29462894 |
| B6 | 1.43370938 |
| B7 | 1.08483581 |

|     |               |
|-----|---------------|
| B8  | 1.34318959    |
| B9  | 1.08491292    |
| B10 | 1.08290748    |
| A1  | 89.02384163   |
| A2  | 68.64251991   |
| A3  | 47.01191812   |
| A4  | 78.04367645   |
| A5  | 119.18841243  |
| A6  | 116.80966450  |
| A7  | 121.41733935  |
| A8  | 121.40438694  |
| A9  | 121.54869228  |
| D1  | 157.19643507  |
| D2  | -87.86782341  |
| D3  | -73.72861180  |
| D4  | -133.62919208 |
| D5  | 7.90681073    |
| D6  | -171.92589798 |
| D7  | -1.24184038   |
| D8  | 179.67861776  |

Reaction 18 (H<sub>2</sub>S Addition)

|   |    |     |   |    |   |    |
|---|----|-----|---|----|---|----|
| O | 1  |     |   |    |   |    |
| C |    |     |   |    |   |    |
| O | 1  | B1  |   |    |   |    |
| H | 2  | B2  | 1 | A1 |   |    |
| O | 1  | B3  | 2 | A2 | 3 | D1 |
| H | 4  | B4  | 1 | A3 | 2 | D2 |
| C | 1  | B5  | 4 | A4 | 2 | D3 |
| H | 6  | B6  | 1 | A5 | 4 | D4 |
| H | 6  | B7  | 1 | A6 | 4 | D5 |
| H | 6  | B8  | 1 | A7 | 4 | D6 |
| S | 1  | B9  | 4 | A8 | 2 | D7 |
| H | 10 | B10 | 1 | A9 | 4 | D8 |

|     |               |
|-----|---------------|
| B1  | 1.31297615    |
| B2  | 0.97080269    |
| B3  | 1.29997291    |
| B4  | 1.06808038    |
| B5  | 1.48990568    |
| B6  | 1.08592019    |
| B7  | 1.08752840    |
| B8  | 1.09920339    |
| B9  | 2.69771811    |
| B10 | 1.34548660    |
| A1  | 108.01892395  |
| A2  | 116.86327814  |
| A3  | 100.00928937  |
| A4  | 124.14841169  |
| A5  | 110.55562826  |
| A6  | 110.86126191  |
| A7  | 106.82092126  |
| A8  | 79.38950509   |
| A9  | 93.92842804   |
| D1  | -14.74954915  |
| D2  | 128.02081375  |
| D3  | 155.72504653  |
| D4  | 35.50310735   |
| D5  | 158.44994891  |
| D6  | -83.04422441  |
| D7  | -116.26648536 |
| D8  | 79.79975255   |

Reaction 19 (H<sub>2</sub>S Addition)

|   |   |    |   |    |    |
|---|---|----|---|----|----|
| O | 1 |    |   |    |    |
| O |   |    |   |    |    |
| C | 1 | B1 |   |    |    |
| S | 2 | B2 | 1 | A1 |    |
| H | 3 | B3 | 2 | A2 | 1  |
| O | 2 | B4 | 1 | A3 | 3  |
| H | 5 | B5 | 2 | A4 | 1  |
|   |   |    |   |    | D1 |
|   |   |    |   |    | D2 |
|   |   |    |   |    | D3 |

|    |               |
|----|---------------|
| B1 | 1.16161333    |
| B2 | 2.31115069    |
| B3 | 1.34598659    |
| B4 | 1.24876178    |
| B5 | 1.21730164    |
| A1 | 122.77946511  |
| A2 | 92.32819014   |
| A3 | 147.41493079  |
| A4 | 91.42671239   |
| D1 | 85.96673118   |
| D2 | -179.64576783 |
| D3 | -179.66288293 |

Reaction 20 (H Abstraction)

|   |   |    |   |    |    |
|---|---|----|---|----|----|
| O | 2 |    |   |    |    |
| S |   |    |   |    |    |
| H | 1 | B1 |   |    |    |
| O | 2 | B2 | 1 | A1 |    |
| H | 3 | B3 | 2 | A2 | 1  |
| H | 1 | B4 | 3 | A3 | 2  |
|   |   |    |   |    | D1 |
|   |   |    |   |    | D2 |

|    |               |
|----|---------------|
| B1 | 1.38468523    |
| B2 | 1.62057545    |
| B3 | 0.97256743    |
| B4 | 1.34351886    |
| A1 | 127.02134243  |
| A2 | 105.26482070  |
| A3 | 83.80557650   |
| D1 | 62.34538442   |
| D2 | -106.99012005 |

Reaction 21 (H Abstraction)

|   |   |    |   |    |    |
|---|---|----|---|----|----|
| O | 2 |    |   |    |    |
| S |   |    |   |    |    |
| H | 1 | B1 |   |    |    |
| O | 2 | B2 | 1 | A1 |    |
| H | 3 | B3 | 2 | A2 | 1  |
| C | 1 | B4 | 3 | A3 | 2  |
| H | 5 | B5 | 1 | A4 | 3  |
| H | 5 | B6 | 1 | A5 | 3  |
| H | 5 | B7 | 1 | A6 | 3  |
|   |   |    |   |    | D1 |
|   |   |    |   |    | D2 |
|   |   |    |   |    | D3 |
|   |   |    |   |    | D4 |
|   |   |    |   |    | D5 |

|    |              |
|----|--------------|
| B1 | 1.37943643   |
| B2 | 1.63381486   |
| B3 | 0.97110774   |
| B4 | 1.82751617   |
| B5 | 1.08910258   |
| B6 | 1.08946410   |
| B7 | 1.08768664   |
| A1 | 121.02632479 |
| A2 | 106.63963115 |
| A3 | 88.19592811  |
| A4 | 110.67989306 |
| A5 | 107.30333460 |
| A6 | 108.45346004 |
| D1 | 65.33490846  |

|    |               |
|----|---------------|
| D2 | -106.22097855 |
| D3 | 100.64185973  |
| D4 | -139.64326280 |
| D5 | -20.84057573  |

Reaction 22 (H Abstraction)

|   |   |    |   |    |    |
|---|---|----|---|----|----|
| O | 2 |    |   |    |    |
| S |   |    |   |    |    |
| H | 1 | B1 |   |    |    |
| H | 1 | B2 | 2 | A1 |    |
| O | 1 | B3 | 2 | A2 | 3  |
| C | 4 | B4 | 1 | A3 | 2  |
| H | 5 | B5 | 4 | A4 | 1  |
| H | 5 | B6 | 4 | A5 | 1  |
| H | 5 | B7 | 4 | A6 | 1  |
|   |   |    |   |    | D1 |
|   |   |    |   |    | D2 |
|   |   |    |   |    | D3 |
|   |   |    |   |    | D4 |
|   |   |    |   |    | D5 |

|    |              |
|----|--------------|
| B1 | 1.34419961   |
| B2 | 1.45479920   |
| B3 | 2.74742624   |
| B4 | 1.39117885   |
| B5 | 1.09724632   |
| B6 | 1.09689110   |
| B7 | 1.10257753   |
| A1 | 92.49590712  |
| A2 | 87.84686134  |
| A3 | 109.15799405 |
| A4 | 112.28549688 |
| A5 | 113.55498664 |
| A6 | 105.12913349 |
| D1 | 13.01778789  |
| D2 | 136.12626705 |
| D3 | -71.23263401 |
| D4 | 55.16747303  |
| D5 | 173.09417135 |

Reaction 23 (H Abstraction)

|   |   |     |   |    |    |
|---|---|-----|---|----|----|
| O | 2 |     |   |    |    |
| S |   |     |   |    |    |
| H | 1 | B1  |   |    |    |
| O | 2 | B2  | 1 | A1 |    |
| C | 1 | B3  | 3 | A2 | 2  |
| H | 4 | B4  | 1 | A3 | 3  |
| H | 4 | B5  | 1 | A4 | 3  |
| H | 4 | B6  | 1 | A5 | 3  |
| C | 3 | B7  | 2 | A6 | 1  |
| H | 8 | B8  | 3 | A7 | 2  |
| H | 8 | B9  | 3 | A8 | 2  |
| H | 8 | B10 | 3 | A9 | 2  |
|   |   |     |   |    | D1 |
|   |   |     |   |    | D2 |
|   |   |     |   |    | D3 |
|   |   |     |   |    | D4 |
|   |   |     |   |    | D5 |
|   |   |     |   |    | D6 |
|   |   |     |   |    | D7 |
|   |   |     |   |    | D8 |

|     |              |
|-----|--------------|
| B1  | 1.43101528   |
| B2  | 1.42943649   |
| B3  | 1.82665054   |
| B4  | 1.09027225   |
| B5  | 1.08934430   |
| B6  | 1.08905715   |
| B7  | 1.39039535   |
| B8  | 1.09774314   |
| B9  | 1.09804405   |
| B10 | 1.10288802   |
| A1  | 147.24147867 |
| A2  | 90.43986584  |
| A3  | 107.24961938 |
| A4  | 109.65411538 |
| A5  | 111.11258757 |



A6 114.73209711  
A7 112.69488768  
A8 113.46561240  
A9 105.52853797  
D1 -110.85287194  
D2 -158.84730031  
D3 -40.54998379  
D4 81.38174328  
D5 77.66926435  
D6 -84.68870487  
D7 41.53949818  
D8 158.96508598

Reaction 24 (H Abstraction)

O 2

O

|   |   |    |   |    |   |
|---|---|----|---|----|---|
| C | 1 | B1 |   |    |   |
| H | 2 | B2 | 1 | A1 |   |
| C | 2 | B3 | 1 | A2 | 3 |
| H | 4 | B4 | 2 | A3 | 1 |
| H | 4 | B5 | 2 | A4 | 1 |
| H | 1 | B6 | 2 | A5 | 4 |
| S | 1 | B7 | 2 | A6 | 4 |
| H | 8 | B8 | 1 | A7 | 2 |

B1 1.28060775  
B2 1.09559864  
B3 1.37925396  
B4 1.08251751  
B5 1.08163638  
B6 1.22143397  
B7 2.83117292  
B8 1.34507960  
A1 117.84640957  
A2 122.54386553  
A3 119.94923259  
A4 120.61927724  
A5 112.22266191  
A6 111.69234761  
A7 92.95539430  
D1 -179.46547483  
D2 -1.06199791  
D3 178.08430852  
D4 175.02194777  
D5 172.66353081  
D6 -179.84752636

Reaction 25 (H Abstraction)

O 2

O

|   |   |     |   |     |   |
|---|---|-----|---|-----|---|
| C | 1 | B1  |   |     |   |
| H | 2 | B2  | 1 | A1  |   |
| C | 2 | B3  | 1 | A2  | 3 |
| H | 4 | B4  | 2 | A3  | 1 |
| H | 4 | B5  | 2 | A4  | 1 |
| H | 1 | B6  | 2 | A5  | 4 |
| S | 1 | B7  | 2 | A6  | 4 |
| C | 8 | B8  | 1 | A7  | 2 |
| H | 9 | B9  | 8 | A8  | 1 |
| H | 9 | B10 | 8 | A9  | 1 |
| H | 9 | B11 | 8 | A10 | 1 |

B1 1.28491958  
B2 1.09663464

B3 1.37437818  
B4 1.08262122  
B5 1.08180233  
B6 1.26284684  
B7 2.81465728  
B8 1.82624029  
B9 1.09127989  
B10 1.08912279  
B11 1.09124032  
A1 117.82005017  
A2 122.94965093  
A3 120.00783517  
A4 120.65147434  
A5 113.04802727  
A6 114.53109459  
A7 95.39492480  
A8 109.68263562  
A9 109.16683134  
A10 110.26094767  
D1 -178.60784817  
D2 -2.05041693  
D3 175.85509051  
D4 165.84180440  
D5 159.42702735  
D6 176.87518894  
D7 37.66252812  
D8 157.32635512  
D9 -82.24690021

Reaction 26 (H Abstraction)

O 2

C

|   |   |    |   |    |   |
|---|---|----|---|----|---|
| H | 1 | B1 |   |    |   |
| H | 1 | B2 | 2 | A1 |   |
| H | 1 | B3 | 3 | A2 | 2 |
| C | 1 | B4 | 3 | A3 | 4 |
| O | 5 | B5 | 1 | A4 | 3 |
| H | 5 | B6 | 1 | A5 | 6 |
| S | 5 | B7 | 1 | A6 | 6 |
| H | 8 | B8 | 5 | A7 | 1 |

B1 1.09285983  
B2 1.09177381  
B3 1.09286280  
B4 1.50423273  
B5 1.17923542  
B6 1.49504170  
B7 3.01734628  
B8 1.34472608  
A1 110.72431231  
A2 110.72368344  
A3 110.73083347  
A4 129.99429303  
A5 110.02014193  
A6 109.77322479  
A7 90.37034567  
D1 -118.94433484  
D2 -120.52670408  
D3 0.01019044  
D4 -180.00000000  
D5 -179.99732858  
D6 180.00000000

Reaction 27 (H Abstraction)

|     |    |       |       |     |  |
|-----|----|-------|-------|-----|--|
| O 2 |    |       |       |     |  |
| C   |    |       |       |     |  |
| H   | 1  | B1    |       |     |  |
| O   | 1  | B2 2  | A1    |     |  |
| C   | 1  | B3 3  | A2 2  | D1  |  |
| H   | 4  | B4 1  | A3 3  | D2  |  |
| H   | 4  | B5 1  | A4 3  | D3  |  |
| H   | 4  | B6 1  | A5 3  | D4  |  |
| C   | 1  | B7 3  | A6 4  | D5  |  |
| H   | 8  | B8 1  | A7 3  | D6  |  |
| C   | 8  | B9 1  | A8 3  | D7  |  |
| H   | 10 | B10 8 | A9 1  | D8  |  |
| H   | 10 | B11 8 | A10 1 | D9  |  |
| H   | 10 | B12 8 | A11 1 | D10 |  |
| S   | 8  | B13 1 | A12 3 | D11 |  |
| H   | 14 | B14 8 | A13 1 | D12 |  |

B1 1.34171929  
 B2 1.19385319  
 B3 1.51057403  
 B4 1.09362979  
 B5 1.09210639  
 B6 1.09421092  
 B7 2.75270230  
 B8 1.09111763  
 B9 1.51095650  
 B10 1.09401673  
 B11 1.09600393  
 B12 1.09408952  
 B13 1.79452206  
 B14 1.34617689  
 A1 119.07340671  
 A2 126.21592316  
 A3 109.08571573  
 A4 110.88150509  
 A5 109.03270637  
 A6 115.72880817  
 A7 105.18404283  
 A8 101.72964551  
 A9 111.19055477  
 A10 111.77846363  
 A11 110.27580831  
 A12 109.54340958  
 A13 97.14726411  
 D1 -179.84664905  
 D2 -122.75984401  
 D3 -0.78827826  
 D4 120.79788576  
 D5 -179.91975435  
 D6 -127.84617836  
 D7 -8.12062755  
 D8 59.50970943  
 D9 -179.98737720  
 D10 -59.58764149  
 D11 117.31818985  
 D12 -66.27100694

Reaction 28 (H Abstraction)

|     |   |      |      |    |  |
|-----|---|------|------|----|--|
| O 2 |   |      |      |    |  |
| C   |   |      |      |    |  |
| H   | 1 | B1   |      |    |  |
| S   | 1 | B2 2 | A1   |    |  |
| H   | 1 | B3 3 | A2 2 | D1 |  |
| O   | 1 | B4 3 | A3 2 | D2 |  |
| H   | 3 | B5 1 | A4 5 | D3 |  |

|   |    |       |       |     |  |
|---|----|-------|-------|-----|--|
| C | 1  | B6 5  | A5 3  | D4  |  |
| H | 7  | B7 1  | A6 5  | D5  |  |
| H | 7  | B8 1  | A7 5  | D6  |  |
| C | 7  | B9 1  | A8 5  | D7  |  |
| H | 10 | B10 7 | A9 1  | D8  |  |
| H | 10 | B11 7 | A10 1 | D9  |  |
| H | 10 | B12 7 | A11 1 | D10 |  |
| C | 1  | B13 5 | A12 7 | D11 |  |
| H | 14 | B14 1 | A13 5 | D12 |  |
| H | 14 | B15 1 | A14 5 | D13 |  |
| H | 14 | B16 1 | A15 5 | D14 |  |

B1 1.28401690  
 B2 1.83743859  
 B3 1.92413156  
 B4 1.39200497  
 B5 1.34804105  
 B6 1.51779464  
 B7 1.09792751  
 B8 1.09247091  
 B9 1.53310162  
 B10 1.09082838  
 B11 1.09285789  
 B12 1.09327468  
 B13 2.74027251  
 B14 1.08651785  
 B15 1.08698310  
 B16 1.08663810  
 A1 100.49672243  
 A2 91.77540660  
 A3 113.33847887  
 A4 96.60383564  
 A5 109.78511408

Reaction 29 (H Abstraction)

|     |    |       |       |     |  |
|-----|----|-------|-------|-----|--|
| O 2 |    |       |       |     |  |
| C   |    |       |       |     |  |
| H   | 1  | B1    |       |     |  |
| S   | 1  | B2 2  | A1    |     |  |
| H   | 1  | B3 3  | A2 2  | D1  |  |
| O   | 1  | B4 3  | A3 2  | D2  |  |
| H   | 3  | B5 1  | A4 5  | D3  |  |
| C   | 1  | B6 5  | A5 3  | D4  |  |
| H   | 7  | B7 1  | A6 5  | D5  |  |
| H   | 7  | B8 1  | A7 5  | D6  |  |
| C   | 7  | B9 1  | A8 5  | D7  |  |
| H   | 10 | B10 7 | A9 1  | D8  |  |
| H   | 10 | B11 7 | A10 1 | D9  |  |
| H   | 10 | B12 7 | A11 1 | D10 |  |
| S   | 1  | B13 5 | A12 7 | D11 |  |
| H   | 14 | B14 1 | A13 5 | D12 |  |

B1 1.46664595  
 B2 1.81756148  
 B3 1.91431315  
 B4 1.37037129  
 B5 1.34774920  
 B6 1.51255380  
 B7 1.09954733  
 B8 1.09211904  
 B9 1.53195056  
 B10 1.09079246  
 B11 1.09228251  
 B12 1.09253470  
 B13 2.99108689

B14 1.34461806  
 A1 100.57953240  
 A2 90.13791541  
 A3 115.43903131  
 A4 95.89326267  
 A5 112.15417435  
 A6 107.85654583  
 A7 107.89153849  
 A8 113.83341103  
 A9 111.18423436  
 A10 109.90874824  
 A11 110.96690942  
 A12 104.84859840  
 A13 89.22988791  
 D1 100.74273525  
 D2 114.32517105

Reaction 30 (H Abstraction)

O 2  
 C  
 H 1 B1  
 S 1 B2 2 A1  
 O 1 B3 3 A2 2 D1  
 H 3 B4 1 A3 4 D2  
 C 3 B5 1 A4 4 D3  
 H 6 B6 3 A5 1 D4  
 H 6 B7 3 A6 1 D5  
 H 6 B8 3 A7 1 D6

B1 1.10610232  
 B2 1.78655887  
 B3 1.20010636  
 B4 1.43659437  
 B5 3.10775670  
 B6 1.08235535  
 B7 1.08337107  
 B8 1.08336976  
 A1 110.18896318  
 A2 126.64856393  
 A3 94.28478093  
 A4 90.67153687  
 A5 91.48617080  
 A6 100.89263206  
 A7 100.89081839  
 D1 -180.00000000  
 D2 0.00000000  
 D3 0.00000000  
 D4 0.00693452  
 D5 119.26389364  
 D6 -119.24930416

Reaction 31 (R Addition to Multiple Bond)

O 2  
 C  
 H 1 B1  
 H 1 B2 2 A1  
 O 1 B3 3 A2 2 D1  
 H 4 B4 1 A3 3 D2  
 S 1 B5 4 A4 5 D3  
 B1 2.05616891  
 B2 1.08745098  
 B3 1.32944119  
 B4 0.97164771

B5 1.64411920  
 A1 80.92840077  
 A2 110.46443283  
 A3 107.81533412  
 A4 125.62349457  
 D1 100.47043138  
 D2 177.07429207  
 D3 5.09247682

Reaction 32 (R Addition to Multiple Bond)

O 2  
 C  
 H 1 B1  
 O 1 B2 2 A1  
 H 3 B3 1 A2 2 D1  
 S 1 B4 3 A3 4 D2  
 C 1 B5 3 A4 5 D3  
 H 6 B6 1 A5 3 D4  
 H 6 B7 1 A6 3 D5  
 H 6 B8 1 A7 3 D6

B1 1.08575744  
 B2 1.34323684  
 B3 0.97026639  
 B4 1.65829303  
 B5 2.33352562  
 B6 1.08172270  
 B7 1.08257750  
 B8 1.08172037  
 A1 110.56679198  
 A2 107.20136517  
 A3 124.13777696  
 A4 99.92220580  
 A5 102.35372855  
 A6 94.54578138  
 A7 99.20947367  
 D1 171.33482287  
 D2 8.99323752  
 D3 -110.93215330  
 D4 -168.89487860  
 D5 -48.58800636  
 D6 70.28335675

Reaction 33 (R Addition to Multiple Bond)

O 2  
 C  
 H 1 B1  
 S 1 B2 2 A1  
 H 1 B3 3 A2 2 D1  
 O 1 B4 3 A3 2 D2  
 C 1 B5 5 A4 3 D3  
 H 6 B6 1 A5 5 D4  
 H 6 B7 1 A6 5 D5  
 C 6 B8 1 A7 5 D6  
 H 9 B9 6 A8 1 D7  
 H 9 B10 6 A9 1 D8  
 H 9 B11 6 A10 1 D9  
 B1 1.08506964  
 B2 1.66122722  
 B3 1.87673168  
 B4 1.34876450  
 B5 2.31381675  
 B6 1.08341740

B7 1.08574359  
 B8 1.48869298  
 B9 1.09196020  
 B10 1.10022364  
 B11 1.09367189  
 A1 122.64070970  
 A2 94.23077058  
 A3 123.58455281  
 A4 99.97990035  
 A5 98.83768467  
 A6 93.23298522  
 A7 105.56324380  
 A8 111.85514965  
 A9 110.34430339  
 A10 111.35820683  
 D1 162.25124736  
 D2 157.88415191  
 D3 -112.67002903  
 D4 172.84388360  
 D5 -70.67873835  
 D6 49.38602176  
 D7 67.93941202  
 D8 -172.67637487  
 D9 -54.38036989

Reaction 34 (R Addition to Multiple Bond)

O 2  
 C  
 C 1 B1  
 H 2 B2 1 A1  
 H 2 B3 1 A2 3 D1  
 H 2 B4 1 A3 4 D2  
 S 1 B5 2 A4 3 D3  
 O 1 B6 2 A5 6 D4  
 H 7 B7 1 A6 2 D5  
 H 6 B8 1 A7 7 D6

B1 1.49372289  
 B2 1.08729115  
 B3 1.09434835  
 B4 1.09450227  
 B5 1.66539738  
 B6 1.31581309  
 B7 0.99834934  
 B8 1.89962646  
 A1 111.15231564  
 A2 109.54287857  
 A3 109.11148925  
 A4 124.55420476  
 A5 114.15714215  
 A6 105.36913802  
 A7 84.82063081  
 D1 120.87976765  
 D2 117.18804933  
 D3 -5.27084193  
 D4 179.04807016  
 D5 -167.88277996  
 D6 -20.71672733

Reaction 35 (R Addition to Multiple Bond)

O 2  
 C  
 H 1 B1  
 O 1 B2 2 A1

S 1 B3 3 A2 2 D1  
 B1 1.78565321  
 B2 1.16069312  
 B3 1.59664649  
 A1 105.13580154  
 A2 166.07040528  
 D1 180.00000000

Reaction 36 (R Addition to Multiple Bond)

O 2  
 C  
 O 1 B1  
 S 1 B2 2 A1  
 C 1 B3 2 A2 3 D1  
 H 4 B4 1 A3 2 D2  
 H 4 B5 1 A4 2 D3  
 H 4 B6 1 A5 2 D4  
 B1 1.17158053  
 B2 1.61828392  
 B3 2.11871837  
 B4 1.08124638  
 B5 1.08345031  
 B6 1.08345031  
 A1 155.45769884  
 A2 104.39190869  
 A3 112.53821962  
 A4 94.77580593  
 A5 94.77580593  
 D1 180.00000000  
 D2 180.00000000  
 D3 58.60273649  
 D4 -58.60273649

Reaction 37 (R Addition to Multiple Bond)

O 2  
 C  
 H 1 B1  
 S 1 B2 2 A1  
 H 1 B3 3 A2 2 D1  
 O 1 B4 3 A3 2 D2  
 H 3 B5 1 A4 5 D3  
 C 1 B6 5 A5 3 D4  
 H 7 B7 1 A6 5 D5  
 C 7 B8 1 A7 5 D6  
 H 9 B9 7 A8 1 D7  
 H 9 B10 7 A9 1 D8  
 H 9 B11 7 A10 1 D9  
 B1 1.08737825  
 B2 2.32711178  
 B3 1.90259796  
 B4 1.36468128  
 B5 1.34423770  
 B6 1.38917352  
 B7 1.08578691  
 B8 1.48898565  
 B9 1.09654452  
 B10 1.09588957  
 B11 1.09194416  
 A1 90.84821526  
 A2 86.13139032  
 A3 104.53407822

A4 89.52893117  
 A5 117.24339310  
 A6 116.85291456  
 A7 123.74474050  
 A8 110.74728370  
 A9 111.11958320  
 A10 111.97287393  
 D1 95.49214913  
 D2 117.77567876  
 D3 -55.41169060  
 D4 -111.61248856  
 D5 17.78903281  
 D6 -167.09299106  
 D7 125.40734339  
 D8 -116.10147223  
 D9 4.50221047

Reaction 38 (Tautomerization)

O 1  
 C  
 H 1 B1  
 S 1 B2 2 A1  
 O 1 B3 3 A2 2 D1  
 H 4 B4 1 A3 3 D2

B1 1.09134728  
 B2 1.69169644  
 B3 1.25902131  
 B4 1.36911194  
 A1 126.21572947  
 A2 112.29692829  
 A3 79.53015109  
 D1 180.00000000  
 D2 0.00000000

Reaction 39 (Tautomerization)

O 1  
 C  
 S 1 B1  
 O 1 B2 2 A1  
 H 3 B3 1 A2 2 D1  
 C 1 B4 3 A3 2 D2  
 H 5 B5 1 A4 3 D3  
 H 5 B6 1 A5 3 D4  
 H 5 B7 1 A6 3 D5

B1 1.71565296  
 B2 1.26511572  
 B3 1.35394941  
 B4 1.49376307  
 B5 1.09292322  
 B6 1.09188644  
 B7 1.08917340  
 A1 109.91449838  
 A2 80.51887430  
 A3 122.18087363  
 A4 109.54518382  
 A5 110.14976965  
 A6 110.00428002  
 D1 0.03502534  
 D2 -179.67609045  
 D3 116.49499242  
 D4 -125.73087918  
 D5 -4.16341740

Reaction 40 (Tautomerization)

O 1  
 C  
 S 1 B1  
 O 1 B2 2 A1  
 H 3 B3 1 A2 2 D1  
 C 1 B4 3 A3 2 D2  
 H 5 B5 1 A4 3 D3  
 H 5 B6 1 A5 3 D4  
 C 5 B7 1 A6 3 D5  
 H 8 B8 5 A7 1 D6  
 H 8 B9 5 A8 1 D7  
 H 8 B10 5 A9 1 D8

B1 1.71654565  
 B2 1.26621316  
 B3 1.35604563  
 B4 1.49820162  
 B5 1.09757901  
 B6 1.09331079  
 B7 1.53020946  
 B8 1.09204080  
 B9 1.09191253  
 B10 1.09206599  
 A1 109.86049245  
 A2 80.39569257  
 A3 121.63102006  
 A4 105.80789959  
 A5 106.98615181  
 A6 115.17566972  
 A7 110.19470349  
 A8 111.14744209  
 A9 111.11783259  
 D1 -0.21602671  
 D2 178.44187920  
 D3 -87.70774888  
 D4 25.35274533  
 D5 150.40376100  
 D6 178.83805632  
 D7 -61.31091815  
 D8 58.90915053

## Z-Matrices for Molecules

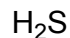

|     |   |      |    |  |  |
|-----|---|------|----|--|--|
| 0 1 |   |      |    |  |  |
| S   |   |      |    |  |  |
| H   | 1 | B1   |    |  |  |
| H   | 1 | B2 2 | A1 |  |  |

|    |             |
|----|-------------|
| B1 | 1.34327993  |
| B2 | 1.34327993  |
| A1 | 92.58329996 |

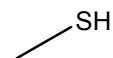

|     |   |      |      |    |  |
|-----|---|------|------|----|--|
| 0 1 |   |      |      |    |  |
| S   |   |      |      |    |  |
| H   | 1 | B1   |      |    |  |
| C   | 1 | B2 2 | A1   |    |  |
| H   | 3 | B3 1 | A2 2 | D1 |  |
| H   | 3 | B4 1 | A3 2 | D2 |  |
| H   | 3 | B5 1 | A4 2 | D3 |  |

|    |              |
|----|--------------|
| B1 | 1.34383796   |
| B2 | 1.83186600   |
| B3 | 1.09011110   |
| B4 | 1.08923069   |
| B5 | 1.08923069   |
| A1 | 97.09044649  |
| A2 | 106.02458786 |
| A3 | 111.27496891 |
| A4 | 111.27496891 |
| D1 | 180.00000000 |
| D2 | -61.86427348 |
| D3 | 61.86427348  |

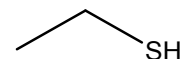

|     |   |      |      |    |  |
|-----|---|------|------|----|--|
| 0 1 |   |      |      |    |  |
| S   |   |      |      |    |  |
| C   | 1 | B1   |      |    |  |
| H   | 2 | B2 1 | A1   |    |  |
| H   | 2 | B3 1 | A2 3 | D1 |  |
| H   | 1 | B4 2 | A3 4 | D2 |  |
| C   | 2 | B5 1 | A4 5 | D3 |  |
| H   | 6 | B6 2 | A5 1 | D4 |  |
| H   | 6 | B7 2 | A6 1 | D5 |  |
| H   | 6 | B8 2 | A7 1 | D6 |  |

|    |               |
|----|---------------|
| B1 | 1.84053942    |
| B2 | 1.09238710    |
| B3 | 1.09119687    |
| B4 | 1.34468713    |
| B5 | 1.52495257    |
| B6 | 1.09312266    |
| B7 | 1.09511375    |
| B8 | 1.09182844    |
| A1 | 103.76609343  |
| A2 | 108.65066099  |
| A3 | 96.83197082   |
| A4 | 114.35965187  |
| A5 | 111.21618781  |
| A6 | 110.30998782  |
| A7 | 111.06606383  |
| D1 | -113.79907940 |

|    |               |
|----|---------------|
| D2 | 62.42213671   |
| D3 | -62.92877011  |
| D4 | 63.33941833   |
| D5 | -177.11626126 |
| D6 | -56.84849601  |

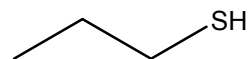

|     |    |       |       |    |  |
|-----|----|-------|-------|----|--|
| 0 1 |    |       |       |    |  |
| C   |    |       |       |    |  |
| H   | 1  | B1    |       |    |  |
| H   | 1  | B2 2  | A1    |    |  |
| H   | 1  | B3 2  | A2 3  | D1 |  |
| C   | 1  | B4 2  | A3 4  | D2 |  |
| H   | 5  | B5 1  | A4 2  | D3 |  |
| H   | 5  | B6 1  | A5 2  | D4 |  |
| C   | 5  | B7 1  | A6 2  | D5 |  |
| H   | 8  | B8 5  | A7 1  | D6 |  |
| H   | 8  | B9 5  | A8 1  | D7 |  |
| S   | 8  | B10 5 | A9 1  | D8 |  |
| H   | 11 | B11 8 | A10 5 | D9 |  |

|     |              |
|-----|--------------|
| B1  | 1.09296552   |
| B2  | 1.09427295   |
| B3  | 1.09423755   |
| B4  | 1.53302284   |
| B5  | 1.09555313   |
| B6  | 1.09395255   |
| B7  | 1.52840858   |
| B8  | 1.09215111   |
| B9  | 1.09345327   |
| B10 | 1.83917085   |
| B11 | 1.34460303   |
| A1  | 107.66141600 |
| A2  | 107.65336841 |
| A3  | 110.95296286 |
| A4  | 109.62637827 |
| A5  | 110.19348596 |
| A6  | 112.29767774 |
| A7  | 111.28472530 |
| A8  | 110.55368506 |
| A9  | 114.64658137 |
| A10 | 96.87039863  |
| D1  | 115.84020434 |
| D2  | 121.99793697 |
| D3  | 57.88209488  |
| D4  | -58.80671228 |
| D5  | 179.43674741 |
| D6  | -58.70398120 |
| D7  | 60.20350086  |
| D8  | 177.27783367 |
| D9  | 63.42757476  |

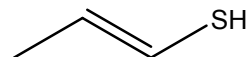

|     |   |      |      |    |  |
|-----|---|------|------|----|--|
| 0 1 |   |      |      |    |  |
| S   |   |      |      |    |  |
| H   | 1 | B1   |      |    |  |
| C   | 1 | B2 2 | A1   |    |  |
| H   | 3 | B3 1 | A2 2 | D1 |  |
| C   | 3 | B4 1 | A3 2 | D2 |  |
| H   | 5 | B5 3 | A4 1 | D3 |  |
| C   | 5 | B6 3 | A5 1 | D4 |  |
| H   | 7 | B7 5 | A6 3 | D5 |  |
| H   | 7 | B8 5 | A7 3 | D6 |  |

|    |               |      |      |    |
|----|---------------|------|------|----|
| H  | 7             | B9 5 | A8 3 | D7 |
| B1 | 1.34532355    |      |      |    |
| B2 | 1.78052170    |      |      |    |
| B3 | 1.08571181    |      |      |    |
| B4 | 1.33181721    |      |      |    |
| B5 | 1.08762779    |      |      |    |
| B6 | 1.50011270    |      |      |    |
| B7 | 1.09539567    |      |      |    |
| B8 | 1.09580977    |      |      |    |
| B9 | 1.09237416    |      |      |    |
| A1 | 97.31310735   |      |      |    |
| A2 | 115.85277913  |      |      |    |
| A3 | 122.48313340  |      |      |    |
| A4 | 118.86048255  |      |      |    |
| A5 | 124.35969445  |      |      |    |
| A6 | 110.89890200  |      |      |    |
| A7 | 110.98590451  |      |      |    |
| A8 | 111.74837446  |      |      |    |
| D1 | -46.86082688  |      |      |    |
| D2 | 138.77175358  |      |      |    |
| D3 | -6.10052339   |      |      |    |
| D4 | 173.34810986  |      |      |    |
| D5 | 123.63308977  |      |      |    |
| D6 | -117.94027294 |      |      |    |
| D7 | 2.68220294    |      |      |    |

|    |               |
|----|---------------|
| D2 | 0.08504453    |
| D3 | -121.81265346 |
| D4 | 121.94294055  |

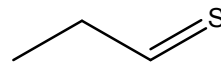

|    |   |      |      |    |  |
|----|---|------|------|----|--|
| O1 |   |      |      |    |  |
| C  |   |      |      |    |  |
| C  | 1 | B1   |      |    |  |
| H  | 2 | B2 1 | A1   |    |  |
| S  | 2 | B3 1 | A2 3 | D1 |  |
| H  | 1 | B4 2 | A3 4 | D2 |  |
| H  | 1 | B5 2 | A4 4 | D3 |  |
| C  | 1 | B6 2 | A5 4 | D4 |  |
| H  | 7 | B7 1 | A6 2 | D5 |  |
| H  | 7 | B8 1 | A7 2 | D6 |  |
| H  | 7 | B9 1 | A8 2 | D7 |  |

|    |               |
|----|---------------|
| B1 | 1.49928079    |
| B2 | 1.09327780    |
| B3 | 1.62101959    |
| B4 | 1.10069884    |
| B5 | 1.10021014    |
| B6 | 1.52446846    |
| B7 | 1.09248638    |
| B8 | 1.09173182    |
| B9 | 1.09173185    |
| A1 | 113.68135958  |
| A2 | 127.79107438  |
| A3 | 106.54145479  |
| A4 | 106.58648058  |
| A5 | 117.20947132  |
| A6 | 110.14116314  |
| A7 | 111.21517133  |
| A8 | 111.20612761  |
| D1 | -179.99577006 |
| D2 | -124.75872528 |
| D3 | 124.70098749  |
| D4 | -0.03955432   |
| D5 | -179.97522250 |
| D6 | -59.74443602  |
| D7 | 59.81639596   |

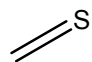

|    |              |      |      |    |  |
|----|--------------|------|------|----|--|
| O1 |              |      |      |    |  |
| C  |              |      |      |    |  |
| H  | 1            | B1   |      |    |  |
| H  | 1            | B2 2 | A1   |    |  |
| S  | 1            | B3 3 | A2 2 | D1 |  |
| B1 | 1.08986346   |      |      |    |  |
| B2 | 1.08985705   |      |      |    |  |
| B3 | 1.61084700   |      |      |    |  |
| A1 | 115.92565035 |      |      |    |  |
| A2 | 122.03997793 |      |      |    |  |
| D1 | 180.00000000 |      |      |    |  |

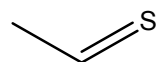

|    |               |      |      |    |  |
|----|---------------|------|------|----|--|
| O1 |               |      |      |    |  |
| C  |               |      |      |    |  |
| H  | 1             | B1   |      |    |  |
| C  | 1             | B2 2 | A1   |    |  |
| H  | 3             | B3 1 | A2 2 | D1 |  |
| S  | 3             | B4 1 | A3 2 | D2 |  |
| H  | 1             | B5 3 | A4 5 | D3 |  |
| H  | 1             | B6 3 | A5 5 | D4 |  |
| B1 | 1.08911236    |      |      |    |  |
| B2 | 1.49291678    |      |      |    |  |
| B3 | 1.09300816    |      |      |    |  |
| B4 | 1.61980609    |      |      |    |  |
| B5 | 1.09733033    |      |      |    |  |
| B6 | 1.09697723    |      |      |    |  |
| A1 | 111.78326121  |      |      |    |  |
| A2 | 114.81232591  |      |      |    |  |
| A3 | 126.45725204  |      |      |    |  |
| A4 | 109.77445206  |      |      |    |  |
| A5 | 109.77061696  |      |      |    |  |
| D1 | -179.94981833 |      |      |    |  |

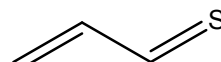

|    |   |      |      |    |  |
|----|---|------|------|----|--|
| O1 |   |      |      |    |  |
| C  |   |      |      |    |  |
| H  | 1 | B1   |      |    |  |
| H  | 1 | B2 2 | A1   |    |  |
| C  | 1 | B3 3 | A2 2 | D1 |  |
| H  | 4 | B4 1 | A3 3 | D2 |  |
| C  | 4 | B5 1 | A4 3 | D3 |  |
| H  | 6 | B6 4 | A5 1 | D4 |  |
| S  | 6 | B7 4 | A6 1 | D5 |  |

|    |              |
|----|--------------|
| B1 | 1.08537379   |
| B2 | 1.08343568   |
| B3 | 1.34113138   |
| B4 | 1.08544944   |
| B5 | 1.44806876   |
| B6 | 1.09276072   |
| B7 | 1.63104353   |
| A1 | 116.94777260 |
| A2 | 121.70641804 |

A3 121.00766131  
 A4 122.16993040  
 A5 115.20326215  
 A6 125.48088108  
 D1 180.00000000  
 D2 0.00000000  
 D3 180.00000000  
 D4 0.00000000  
 D5 180.00000000

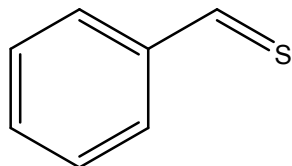

0 1  
 C  
 C 1 B1  
 C 2 B2 1 A1  
 C 3 B3 2 A2 1 D1  
 C 4 B4 3 A3 2 D2  
 C 5 B5 4 A4 3 D3  
 H 1 B6 2 A5 3 D4  
 H 2 B7 1 A6 6 D5  
 H 4 B8 3 A7 2 D6  
 H 5 B9 4 A8 3 D7  
 H 6 B10 5 A9 4 D8  
 C 3 B11 2 A10 1 D9  
 H 12 B12 3 A11 2 D10  
 S 12 B13 3 A12 2 D11

B1 1.38583731  
 B2 1.40631088  
 B3 1.40609500  
 B4 1.38987996  
 B5 1.39345706  
 B6 1.08398609  
 B7 1.08322962  
 B8 1.08512018  
 B9 1.08378357  
 B10 1.08423243  
 B11 1.45923514  
 B12 1.09226383  
 B13 1.63252372  
 A1 120.31139208  
 A2 118.85050477  
 A3 120.73741607  
 A4 119.74311405  
 A5 119.88992438  
 A6 120.99897969  
 A7 119.21083836  
 A8 120.07200812  
 A9 119.96407636  
 A10 122.56927572  
 A11 113.69391049  
 A12 128.27241311  
 D1 -0.00000000  
 D2 0.00435527  
 D3 -0.00380186  
 D4 -179.99658450

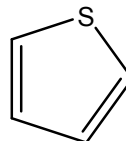

0 1  
 C  
 C 1 B1  
 C 2 B2 1 A1  
 C 3 B3 2 A2 1 D1  
 S 4 B4 3 A3 2 D2  
 H 1 B5 2 A4 3 D3  
 H 2 B6 1 A5 5 D4  
 H 3 B7 2 A6 1 D5  
 H 4 B8 3 A7 2 D6

B1 1.36629669  
 B2 1.42594200  
 B3 1.36629669  
 B4 1.72748369  
 B5 1.07892407  
 B6 1.08214933  
 B7 1.08214933  
 B8 1.07892407  
 A1 112.67431284  
 A2 112.67431284  
 A3 111.46777715  
 A4 128.49773050  
 A5 123.34875370  
 A6 123.97693347  
 A7 128.49773050  
 D1 0.00000000  
 D2 0.00000000  
 D3 180.00000000  
 D4 180.00000000  
 D5 180.00000000  
 D6 180.00000000

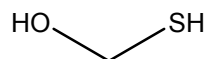

0 1  
 C  
 H 1 B1  
 H 1 B2 2 A1  
 S 1 B3 2 A2 3 D1  
 H 1 B4 4 A3 3 D2  
 O 1 B5 4 A4 3 D3  
 H 4 B6 1 A5 6 D4

B1 1.08805014  
 B2 1.09631959  
 B3 1.84497563  
 B4 1.92992799  
 B5 1.40086701  
 B6 1.34441019  
 A1 108.97259782  
 A2 109.40309483  
 A3 96.91328376  
 A4 114.50396765  
 A5 96.10911750  
 D1 -112.84085378  
 D2 -100.66556114  
 D3 -123.90770400  
 D4 62.65185119



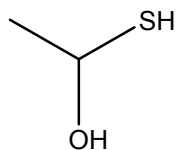

|     |   |    |   |    |   |
|-----|---|----|---|----|---|
| 0 1 |   |    |   |    |   |
| C   |   |    |   |    |   |
| H   | 1 | B1 |   |    |   |
| S   | 1 | B2 | 2 | A1 |   |
| H   | 1 | B3 | 3 | A2 | 2 |
| O   | 1 | B4 | 3 | A3 | 2 |
| H   | 3 | B5 | 1 | A4 | 5 |
| C   | 1 | B6 | 5 | A5 | 3 |
| H   | 7 | B7 | 1 | A6 | 5 |
| H   | 7 | B8 | 1 | A7 | 5 |
| H   | 7 | B9 | 1 | A8 | 5 |

|    |               |
|----|---------------|
| B1 | 1.08942056    |
| B2 | 1.86212814    |
| B3 | 1.93258637    |
| B4 | 1.40618355    |
| B5 | 1.34374699    |
| B6 | 1.52450124    |
| B7 | 1.09213032    |
| B8 | 1.09216321    |
| B9 | 1.09430327    |
| A1 | 107.43710284  |
| A2 | 95.69966608   |
| A3 | 112.16537584  |
| A4 | 95.43657376   |
| A5 | 112.90485694  |
| A6 | 111.56130222  |
| A7 | 108.84778614  |
| A8 | 110.84308365  |
| D1 | 139.38757587  |
| D2 | 115.43728334  |
| D3 | 56.61660460   |
| D4 | -122.50257855 |
| D5 | -174.28312724 |
| D6 | -54.12186971  |
| D7 | 64.87864161   |

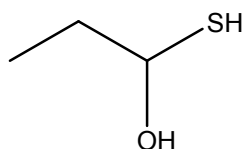

|     |    |     |   |     |   |
|-----|----|-----|---|-----|---|
| 0 1 |    |     |   |     |   |
| C   |    |     |   |     |   |
| H   | 1  | B1  |   |     |   |
| S   | 1  | B2  | 2 | A1  |   |
| H   | 1  | B3  | 3 | A2  | 2 |
| O   | 1  | B4  | 3 | A3  | 2 |
| H   | 3  | B5  | 1 | A4  | 5 |
| C   | 1  | B6  | 5 | A5  | 3 |
| H   | 7  | B7  | 1 | A6  | 5 |
| H   | 7  | B8  | 1 | A7  | 5 |
| C   | 7  | B9  | 1 | A8  | 5 |
| H   | 10 | B10 | 7 | A9  | 1 |
| H   | 10 | B11 | 7 | A10 | 1 |
| H   | 10 | B12 | 7 | A11 | 1 |

|    |            |
|----|------------|
| B1 | 1.09048552 |
| B2 | 1.86078422 |

|     |               |
|-----|---------------|
| B3  | 1.93273142    |
| B4  | 1.40770086    |
| B5  | 1.34378990    |
| B6  | 1.53113914    |
| B7  | 1.09694377    |
| B8  | 1.09434082    |
| B9  | 1.53133853    |
| B10 | 1.09139945    |
| B11 | 1.09258576    |
| B12 | 1.09395990    |
| A1  | 107.60419848  |
| A2  | 94.96540335   |
| A3  | 111.97160606  |
| A4  | 95.39442757   |
| A5  | 113.24310404  |
| A6  | 108.55913773  |
| A7  | 108.92222458  |
| A8  | 112.26110141  |
| A9  | 110.80571403  |
| A10 | 110.75959819  |
| A11 | 111.12375186  |
| D1  | 138.92696503  |
| D2  | 115.38946402  |
| D3  | 56.37650528   |
| D4  | -122.54880092 |
| D5  | 63.22114369   |
| D6  | 178.96904156  |
| D7  | -58.65623844  |
| D8  | 56.43656289   |
| D9  | 176.81078747  |
| D10 | -63.38460230  |

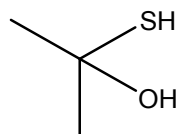

|     |    |     |    |     |    |
|-----|----|-----|----|-----|----|
| 0 1 |    |     |    |     |    |
| C   |    |     |    |     |    |
| C   | 1  | B1  |    |     |    |
| H   | 2  | B2  | 1  | A1  |    |
| H   | 2  | B3  | 1  | A2  | 3  |
| H   | 2  | B4  | 1  | A3  | 4  |
| C   | 1  | B5  | 2  | A4  | 3  |
| H   | 6  | B6  | 1  | A5  | 2  |
| H   | 6  | B7  | 1  | A6  | 2  |
| H   | 6  | B8  | 1  | A7  | 2  |
| O   | 1  | B9  | 6  | A8  | 2  |
| H   | 10 | B10 | 1  | A9  | 6  |
| S   | 1  | B11 | 10 | A10 | 6  |
| H   | 12 | B12 | 1  | A11 | 10 |

|     |              |
|-----|--------------|
| B1  | 1.53155226   |
| B2  | 1.09213292   |
| B3  | 1.09325617   |
| B4  | 1.09262086   |
| B5  | 1.52413017   |
| B6  | 1.09114207   |
| B7  | 1.09006910   |
| B8  | 1.09393745   |
| B9  | 1.41363530   |
| B10 | 0.96410453   |
| B11 | 1.88012147   |
| B12 | 1.34385195   |
| A1  | 111.66641592 |

A2 110.92539111  
 A3 108.69601286  
 A4 112.21955855  
 A5 110.38629665  
 A6 110.99918963  
 A7 109.09823233  
 A8 106.06456084  
 A9 107.85672850  
 A10 110.27459465  
 A11 95.37272693  
 D1 120.93715318  
 D2 118.97780146

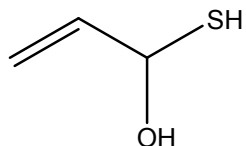

O1  
 C  
 C 1 B1  
 H 1 B2 2 A1  
 C 2 B3 1 A2 3 D1  
 H 4 B4 2 A3 1 D2  
 S 4 B5 2 A4 1 D3  
 H 6 B6 4 A5 2 D4  
 O 4 B7 2 A6 1 D5  
 H 8 B8 4 A7 2 D6  
 H 1 B9 2 A8 4 D7  
 H 2 B10 1 A9 4 D8

B1 1.32874062  
 B2 1.08257034  
 B3 1.49802600  
 B4 1.09908645  
 B5 1.86827249  
 B6 1.34470065  
 B7 1.40218310  
 B8 0.96269212  
 B9 1.08354032  
 B10 1.08519199  
 A1 121.18039583  
 A2 124.22705167  
 A3 109.62845066  
 A4 110.97205581  
 A5 95.49487208  
 A6 110.23340839  
 A7 107.84054077  
 A8 120.94524817  
 A9 121.15497285  
 D1 -0.51648923  
 D2 128.37483887  
 D3 -120.21786673  
 D4 55.82968456

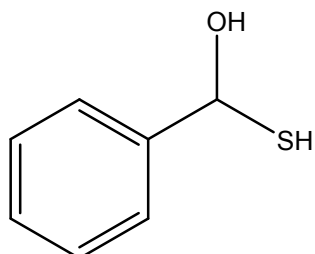

O1  
 C  
 C 1 B1  
 C 2 B2 1 A1  
 C 3 B3 2 A2 1 D1  
 C 4 B4 3 A3 2 D2  
 C 1 B5 2 A4 3 D3  
 H 1 B6 6 A5 5 D4  
 H 2 B7 1 A6 6 D5  
 H 4 B8 3 A7 2 D6  
 H 5 B9 4 A8 3 D7  
 H 6 B10 1 A9 2 D8  
 C 3 B11 2 A10 1 D9  
 H 12 B12 3 A11 2 D10  
 S 12 B13 3 A12 2 D11  
 H 14 B14 12 A13 3 D12  
 O 12 B15 3 A14 2 D13  
 H 16 B16 12 A15 3 D14

B1 1.39399594  
 B2 1.39607107  
 B3 1.39818637  
 B4 1.39030253  
 B5 1.39194203  
 B6 1.08437641  
 B7 1.08184769  
 B8 1.08511940  
 B9 1.08420219  
 B10 1.08415375  
 B11 1.51035911  
 B12 1.09699029  
 B13 1.86888724  
 B14 1.34448819  
 B15 1.40568942  
 B16 0.96297390  
 A1 120.16622158  
 A2 119.27166693  
 A3 120.47648243  
 A4 120.35772174  
 A5 120.05967823  
 A6 120.62856761  
 A7 119.67029049  
 A8 119.77928758  
 A9 120.23801717  
 A10 120.79933238  
 A11 109.65327719  
 A12 112.51388146  
 A13 95.76510392  
 A14 109.59381567

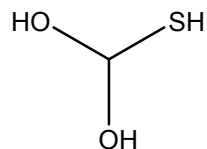

O1  
 O  
 H 1 B1  
 C 1 B2 2 A1  
 H 3 B3 1 A2 2 D1  
 O 3 B4 1 A3 2 D2  
 H 5 B5 3 A4 1 D3  
 S 3 B6 1 A5 5 D4  
 H 7 B7 3 A6 1 D5

B1 0.96450733  
 B2 1.40087093  
 B3 1.09209024  
 B4 1.39127132  
 B5 0.96695303  
 B6 1.84944195  
 B7 1.34349025  
 A1 107.18581139  
 A2 112.43232807  
 A3 112.92332347  
 A4 107.16603098  
 A5 102.98249434  
 A6 94.45879714  
 D1 60.00611100  
 D2 -59.32426671  
 D3 -61.62227888  
 D4 -122.76729069  
 D5 177.78436734

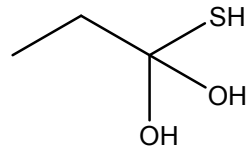

0 1  
 O  
 H 1 B1  
 C 1 B2 2 A1  
 O 3 B3 1 A2 2 D1  
 H 4 B4 3 A3 1 D2  
 S 3 B5 1 A4 4 D3  
 H 6 B6 3 A5 1 D4  
 C 3 B7 1 A6 4 D5  
 H 8 B8 3 A7 1 D6  
 H 8 B9 3 A8 1 D7  
 C 8 B10 3 A9 1 D8  
 H 11 B11 8 A10 3 D9  
 H 11 B12 8 A11 3 D10  
 H 11 B13 8 A12 3 D11

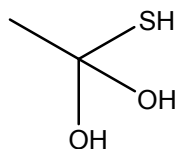

0 1  
 O  
 H 1 B1  
 C 1 B2 2 A1  
 O 3 B3 1 A2 2 D1  
 H 4 B4 3 A3 1 D2  
 S 3 B5 1 A4 4 D3  
 H 6 B6 3 A5 1 D4  
 C 3 B7 1 A6 4 D5  
 H 8 B8 3 A7 1 D6  
 H 8 B9 3 A8 1 D7  
 H 8 B10 3 A9 1 D8

B1 0.96573042  
 B2 1.39751830  
 B3 1.40993358  
 B4 0.96519364  
 B5 1.86693523  
 B6 1.34321863  
 B7 1.52076055  
 B8 1.08875039  
 B9 1.09515860  
 B10 1.09045662  
 A1 106.99907985  
 A2 111.56261190  
 A3 107.05318157  
 A4 111.77193134  
 A5 94.71337707  
 A6 107.13464078  
 A7 109.96890141  
 A8 108.97026857  
 A9 110.98415161  
 D1 58.53252613  
 D2 63.83689487  
 D3 -112.41827970  
 D4 -56.36913147  
 D5 123.35833608  
 D6 -178.24767173  
 D7 -58.22874155  
 D8 60.52428833

B1 0.96569020  
 B2 1.39907526  
 B3 1.40973471  
 B4 0.96639610  
 B5 1.87029931  
 B6 1.34223842  
 B7 1.52974256  
 B8 1.09244030  
 B9 1.09855839  
 B10 1.52800330  
 B11 1.09267474  
 B12 1.09105084  
 B13 1.09212785  
 A1 107.12842382  
 A2 111.72716095  
 A3 106.86728257  
 A4 107.99118708  
 A5 95.42083569  
 A6 107.41074524  
 A7 107.36558127  
 A8 106.17277748  
 A9 115.35692161  
 A10 110.26358311  
 A11 110.83837669  
 A12 110.94107916

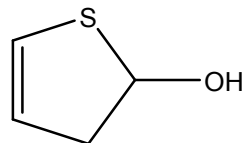

0 1  
 C  
 C 1 B1  
 C 2 B2 1 A1  
 C 3 B3 2 A2 1 D1  
 S 4 B4 3 A3 2 D2  
 H 1 B5 2 A4 3 D3  
 H 2 B6 1 A5 5 D4  
 H 3 B7 2 A6 1 D5  
 H 4 B8 3 A7 2 D6  
 O 1 B9 2 A8 3 D7  
 H 10 B10 1 A9 2 D8

|     |               |     |   |     |    |    |
|-----|---------------|-----|---|-----|----|----|
| H   | 2             | B11 | 1 | A10 | 10 | D9 |
| B1  | 1.54347599    |     |   |     |    |    |
| B2  | 1.50576422    |     |   |     |    |    |
| B3  | 1.33360103    |     |   |     |    |    |
| B4  | 1.77188183    |     |   |     |    |    |
| B5  | 1.08792001    |     |   |     |    |    |
| B6  | 1.09803283    |     |   |     |    |    |
| B7  | 1.08305518    |     |   |     |    |    |
| B8  | 1.08186800    |     |   |     |    |    |
| B9  | 1.40399859    |     |   |     |    |    |
| B10 | 0.96471838    |     |   |     |    |    |
| B11 | 1.09394445    |     |   |     |    |    |
| A1  | 108.06543259  |     |   |     |    |    |
| A2  | 114.27698576  |     |   |     |    |    |
| A3  | 115.12934632  |     |   |     |    |    |
| A4  | 112.48108506  |     |   |     |    |    |
| A5  | 109.54055737  |     |   |     |    |    |
| A6  | 122.30808844  |     |   |     |    |    |
| A7  | 126.56373789  |     |   |     |    |    |
| A8  | 113.74790597  |     |   |     |    |    |
| A9  | 107.91549141  |     |   |     |    |    |
| A10 | 108.63191291  |     |   |     |    |    |
| D1  | -20.33596716  |     |   |     |    |    |
| D2  | 2.60079367    |     |   |     |    |    |
| D3  | 144.08074930  |     |   |     |    |    |
| D4  | -92.41139184  |     |   |     |    |    |
| D5  | 162.24762651  |     |   |     |    |    |
| D6  | -177.27675365 |     |   |     |    |    |
| D7  | -95.43821054  |     |   |     |    |    |
| D8  | 63.87867223   |     |   |     |    |    |
| D9  | 28.32066992   |     |   |     |    |    |

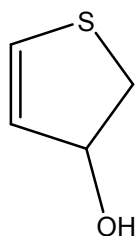

|    |    |     |   |     |   |
|----|----|-----|---|-----|---|
| 01 |    |     |   |     |   |
| C  |    |     |   |     |   |
| C  | 1  | B1  |   |     |   |
| C  | 2  | B2  | 1 | A1  |   |
| C  | 3  | B3  | 2 | A2  | 1 |
| S  | 1  | B4  | 2 | A3  | 3 |
| H  | 1  | B5  | 2 | A4  | 3 |
| H  | 2  | B6  | 1 | A5  | 5 |
| H  | 3  | B7  | 2 | A6  | 1 |
| H  | 4  | B8  | 3 | A7  | 2 |
| O  | 3  | B9  | 2 | A8  | 1 |
| H  | 10 | B10 | 3 | A9  | 2 |
| H  | 4  | B11 | 3 | A10 | 2 |

|     |            |
|-----|------------|
| B1  | 1.33573441 |
| B2  | 1.50986926 |
| B3  | 1.54449580 |
| B4  | 1.76674467 |
| B5  | 1.08233700 |
| B6  | 1.08271631 |
| B7  | 1.09232878 |
| B8  | 1.09113458 |
| B9  | 1.42960265 |
| B10 | 0.96434332 |

|     |               |
|-----|---------------|
| B11 | 1.08892949    |
| A1  | 114.52152719  |
| A2  | 106.19787183  |
| A3  | 115.71993957  |
| A4  | 126.37717583  |
| A5  | 123.78830655  |
| A6  | 112.84731665  |
| A7  | 110.72914650  |
| A8  | 111.19361008  |
| A9  | 107.19666734  |
| A10 | 111.11785060  |
| D1  | -20.47763593  |
| D2  | 5.65313224    |
| D3  | -173.57737747 |
| D4  | 178.10814419  |
| D5  | -140.20511218 |
| D6  | -91.66780120  |
| D7  | 102.96726958  |
| D8  | -46.15265744  |
| D9  | 146.12034924  |

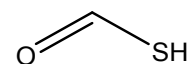

|    |   |    |   |    |   |
|----|---|----|---|----|---|
| 01 |   |    |   |    |   |
| C  |   |    |   |    |   |
| H  | 1 | B1 |   |    |   |
| S  | 1 | B2 | 2 | A1 |   |
| O  | 1 | B3 | 3 | A2 | 2 |
| H  | 3 | B4 | 1 | A3 | 4 |

|    |              |
|----|--------------|
| B1 | 1.10576453   |
| B2 | 1.79752942   |
| B3 | 1.19542243   |
| B4 | 1.34572282   |
| A1 | 110.08306245 |
| A2 | 125.69689117 |
| A3 | 94.50518134  |
| D1 | 180.00000000 |
| D2 | 0.00000000   |

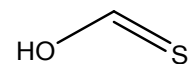

|    |   |    |   |    |   |
|----|---|----|---|----|---|
| 01 |   |    |   |    |   |
| C  |   |    |   |    |   |
| H  | 1 | B1 |   |    |   |
| S  | 1 | B2 | 2 | A1 |   |
| O  | 1 | B3 | 3 | A2 | 2 |
| H  | 4 | B4 | 1 | A3 | 3 |

|    |              |
|----|--------------|
| B1 | 1.08921775   |
| B2 | 1.62596302   |
| B3 | 1.32949740   |
| B4 | 0.97198391   |
| A1 | 123.57937810 |
| A2 | 126.29957375 |
| A3 | 107.80762964 |
| D1 | 179.90186628 |
| D2 | 0.02606869   |

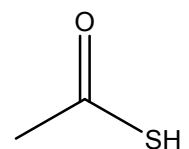

|    |   |      |      |    |  |
|----|---|------|------|----|--|
| 01 |   |      |      |    |  |
| C  |   |      |      |    |  |
| O  | 1 | B1   |      |    |  |
| C  | 1 | B2 2 | A1   |    |  |
| H  | 3 | B3 1 | A2 2 | D1 |  |
| H  | 3 | B4 1 | A3 2 | D2 |  |
| S  | 1 | B5 2 | A4 3 | D3 |  |
| H  | 6 | B6 1 | A5 2 | D4 |  |
| H  | 3 | B7 1 | A6 2 | D5 |  |

|    |               |
|----|---------------|
| B1 | 1.19774937    |
| B2 | 1.51283321    |
| B3 | 1.09401684    |
| B4 | 1.09140301    |
| B5 | 1.82512781    |
| B6 | 1.34345532    |
| B7 | 1.08963736    |
| A1 | 124.80862729  |
| A2 | 108.79436158  |
| A3 | 111.71651508  |
| A4 | 122.29708676  |
| A5 | 93.85479583   |
| A6 | 108.89599266  |
| D1 | 98.99780296   |
| D2 | -141.86451609 |
| D3 | 178.68488821  |
| D4 | -2.10671347   |
| D5 | -19.62516375  |

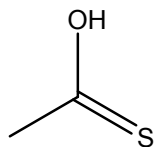

|    |   |      |      |    |  |
|----|---|------|------|----|--|
| 01 |   |      |      |    |  |
| C  |   |      |      |    |  |
| C  | 1 | B1   |      |    |  |
| H  | 2 | B2 1 | A1   |    |  |
| H  | 2 | B3 1 | A2 3 | D1 |  |
| H  | 1 | B4 2 | A3 3 | D2 |  |
| S  | 1 | B5 2 | A4 3 | D3 |  |
| O  | 1 | B6 2 | A5 6 | D4 |  |
| H  | 2 | B7 1 | A6 7 | D5 |  |

|    |               |
|----|---------------|
| B1 | 1.49848588    |
| B2 | 1.09420368    |
| B3 | 1.09430070    |
| B4 | 1.87292773    |
| B5 | 1.63969578    |
| B6 | 1.33885324    |
| B7 | 1.08597920    |
| A1 | 109.36107464  |
| A2 | 109.33581458  |
| A3 | 140.58749223  |
| A4 | 126.27908003  |
| A5 | 110.95040972  |
| A6 | 111.10217807  |
| D1 | 116.99247334  |
| D2 | -58.36976210  |
| D3 | 121.65231491  |
| D4 | 179.98152751  |
| D5 | -179.90117543 |

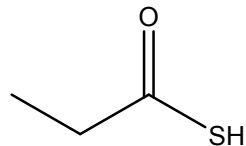

|    |   |       |      |    |  |
|----|---|-------|------|----|--|
| 01 |   |       |      |    |  |
| C  |   |       |      |    |  |
| O  | 1 | B1    |      |    |  |
| C  | 1 | B2 2  | A1   |    |  |
| H  | 3 | B3 1  | A2 2 | D1 |  |
| H  | 3 | B4 1  | A3 2 | D2 |  |
| S  | 1 | B5 2  | A4 3 | D3 |  |
| H  | 6 | B6 1  | A5 2 | D4 |  |
| C  | 3 | B7 1  | A6 2 | D5 |  |
| H  | 8 | B8 3  | A7 1 | D6 |  |
| H  | 8 | B9 3  | A8 1 | D7 |  |
| H  | 8 | B10 3 | A9 1 | D8 |  |

|     |               |
|-----|---------------|
| B1  | 1.19806571    |
| B2  | 1.51965578    |
| B3  | 1.09575341    |
| B4  | 1.09575383    |
| B5  | 1.82812255    |
| B6  | 1.34321366    |
| B7  | 1.52713179    |
| B8  | 1.09130839    |
| B9  | 1.09216916    |
| B10 | 1.09130972    |
| A1  | 125.13150417  |
| A2  | 107.56973028  |
| A3  | 107.56822271  |
| A4  | 122.05276796  |
| A5  | 93.69649727   |
| A6  | 112.93415055  |
| A7  | 111.04721305  |
| A8  | 110.22878732  |
| A9  | 111.04721775  |
| D1  | 123.26628431  |
| D2  | -123.24413935 |
| D3  | -180.00000000 |
| D4  | 0.00000000    |
| D5  | 0.01019880    |
| D6  | 59.80544331   |
| D7  | -180.00000000 |
| D8  | -59.80501915  |

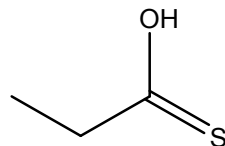

|    |   |       |      |    |  |
|----|---|-------|------|----|--|
| 01 |   |       |      |    |  |
| C  |   |       |      |    |  |
| C  | 1 | B1    |      |    |  |
| H  | 2 | B2 1  | A1   |    |  |
| H  | 2 | B3 1  | A2 3 | D1 |  |
| H  | 1 | B4 2  | A3 4 | D2 |  |
| C  | 2 | B5 1  | A4 5 | D3 |  |
| H  | 6 | B6 2  | A5 1 | D4 |  |
| H  | 6 | B7 2  | A6 1 | D5 |  |
| H  | 6 | B8 2  | A7 1 | D6 |  |
| S  | 1 | B9 2  | A8 6 | D7 |  |
| O  | 1 | B10 2 | A9 6 | D8 |  |

|     |              |
|-----|--------------|
| B1  | 1.50664712   |
| B2  | 1.09691463   |
| B3  | 1.09689703   |
| B4  | 1.87303470   |
| B5  | 1.52442758   |
| B6  | 1.09121667   |
| B7  | 1.09271721   |
| B8  | 1.09122324   |
| B9  | 1.63968447   |
| B10 | 1.34020558   |
| A1  | 106.34154490 |
| A2  | 106.34784405 |
| A3  | 139.79820298 |
| A4  | 116.39631885 |
| A5  | 111.27663597 |
| A6  | 109.79355355 |
| A7  | 111.27618508 |
| A8  | 127.46022351 |
| A9  | 110.14944931 |
| D1  | 111.61512689 |
| D2  | 55.72585386  |
| D3  | 179.92451106 |
| D4  | 59.97451879  |
| D5  | 179.98574847 |
| D6  | -60.00474805 |
| D7  | -0.09332807  |
| D8  | 179.91491469 |

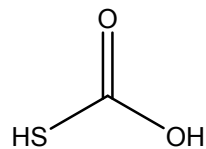

|    |   |    |   |    |   |    |
|----|---|----|---|----|---|----|
| 01 |   |    |   |    |   |    |
| O  |   |    |   |    |   |    |
| C  | 1 | B1 |   |    |   |    |
| S  | 2 | B2 | 1 | A1 |   |    |
| H  | 3 | B3 | 2 | A2 | 1 | D1 |
| O  | 2 | B4 | 1 | A3 | 3 | D2 |
| H  | 5 | B5 | 2 | A4 | 1 | D3 |

|    |               |
|----|---------------|
| B1 | 1.19656630    |
| B2 | 1.79337358    |
| B3 | 1.34209392    |
| B4 | 1.34825050    |
| B5 | 0.96924408    |
| A1 | 126.42044251  |
| A2 | 93.01886327   |
| A3 | 125.20386441  |
| A4 | 106.74967415  |
| D1 | 0.05803270    |
| D2 | -179.98546304 |
| D3 | 0.08285471    |

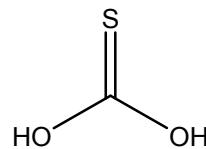

|    |   |    |   |    |   |    |
|----|---|----|---|----|---|----|
| 01 |   |    |   |    |   |    |
| C  |   |    |   |    |   |    |
| S  | 1 | B1 |   |    |   |    |
| O  | 1 | B2 | 2 | A1 |   |    |
| H  | 3 | B3 | 1 | A2 | 2 | D1 |

|   |   |    |   |    |   |    |
|---|---|----|---|----|---|----|
| O | 1 | B4 | 3 | A3 | 2 | D2 |
| H | 5 | B5 | 1 | A4 | 3 | D3 |

|    |               |
|----|---------------|
| B1 | 1.56640000    |
| B2 | 1.43000000    |
| B3 | 0.96000000    |
| B4 | 1.43000000    |
| B5 | 0.96000000    |
| A1 | 120.00000000  |
| A2 | 109.47122063  |
| A3 | 120.00000000  |
| A4 | 109.47122063  |
| D1 | 0.56000000    |
| D2 | 180.00000000  |
| D3 | -179.44000000 |

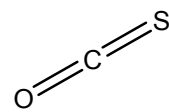

|    |   |    |   |    |  |
|----|---|----|---|----|--|
| 01 |   |    |   |    |  |
| C  |   |    |   |    |  |
| O  | 1 | B1 |   |    |  |
| S  | 1 | B2 | 2 | A1 |  |

|    |              |
|----|--------------|
| B1 | 1.15621300   |
| B2 | 1.56794300   |
| A1 | 180.00000000 |

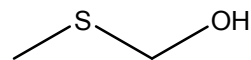

|    |   |    |   |    |   |    |
|----|---|----|---|----|---|----|
| 01 |   |    |   |    |   |    |
| C  |   |    |   |    |   |    |
| H  | 1 | B1 |   |    |   |    |
| H  | 1 | B2 | 2 | A1 |   |    |
| S  | 1 | B3 | 2 | A2 | 3 | D1 |
| H  | 1 | B4 | 4 | A3 | 3 | D2 |
| O  | 1 | B5 | 4 | A4 | 3 | D3 |
| C  | 4 | B6 | 1 | A5 | 6 | D4 |
| H  | 7 | B7 | 4 | A6 | 1 | D5 |
| H  | 7 | B8 | 4 | A7 | 1 | D6 |
| H  | 7 | B9 | 4 | A8 | 1 | D7 |

|    |               |
|----|---------------|
| B1 | 1.09019552    |
| B2 | 1.09629413    |
| B3 | 1.83035144    |
| B4 | 1.93168186    |
| B5 | 1.40858001    |
| B6 | 1.82499384    |
| B7 | 1.08985360    |
| B8 | 1.08923157    |
| B9 | 1.09105195    |
| A1 | 108.91901707  |
| A2 | 109.67157730  |
| A3 | 96.98528466   |
| A4 | 114.22392100  |
| A5 | 99.18395258   |
| A6 | 107.36867120  |
| A7 | 109.32373450  |
| A8 | 110.98399140  |
| D1 | -114.03398203 |
| D2 | -100.37297661 |
| D3 | -123.96817685 |
| D4 | 62.49198961   |
| D5 | -167.63680813 |

D6 -48.93696672  
D7 72.91393937

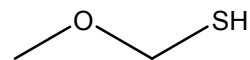

01  
C  
H 1 B1  
H 1 B2 2 A1  
S 1 B3 2 A2 3 D1  
O 1 B4 4 A3 3 D2  
H 4 B5 1 A4 5 D3  
C 5 B6 1 A5 4 D4  
H 7 B7 5 A6 1 D5  
H 7 B8 5 A7 1 D6  
H 7 B9 5 A8 1 D7

B1 1.08774372  
B2 1.09759398  
B3 1.85534041  
B4 1.39330442  
B5 1.34398871  
B6 1.42137194  
B7 1.08926687  
B8 1.09501663  
B9 1.09872843  
A1 109.46746109  
A2 108.43313524  
A3 115.57258072  
A4 95.81165326  
A5 114.64308608  
A6 106.61740023  
A7 111.39271738  
A8 111.01537392  
D1 -112.93337943  
D2 -123.55173124  
D3 66.78540649  
D4 71.51810455  
D5 177.41615541  
D6 -63.24265781  
D7 58.56919967

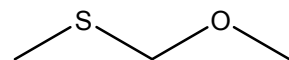

01  
C  
H 1 B1  
H 1 B2 2 A1  
S 1 B3 2 A2 3 D1  
O 1 B4 4 A3 3 D2  
C 5 B5 1 A4 4 D3  
H 6 B6 5 A5 1 D4  
H 6 B7 5 A6 1 D5  
H 6 B8 5 A7 1 D6  
C 4 B9 1 A8 5 D7  
H 10 B10 4 A9 1 D8  
H 10 B11 4 A10 1 D9  
H 10 B12 4 A11 1 D10

B1 1.09022801  
B2 1.09773747  
B3 1.83901543  
B4 1.40124850  
B5 1.42125781  
B6 1.08957697

B7 1.09503508  
B8 1.09876344  
B9 1.82458119  
B10 1.09006077  
B11 1.08949383  
B12 1.09140364  
A1 109.37545296  
A2 108.66909396  
A3 115.26993663  
A4 114.38585677  
A5 106.65262676  
A6 111.50815327  
A7 110.95293700  
A8 98.79027362  
A9 107.24368185  
A10 109.69875912  
A11 111.07084475  
D1 -114.14612563  
D2 -123.79678195  
D3 73.01386436  
D4 177.97934830  
D5 -62.47963997  
D6 59.21382130  
D7 64.03259766  
D8 -170.38779319  
D9 -51.72850243  
D10 70.31510725

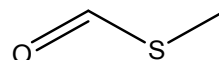

01  
C  
H 1 B1  
C 2 B2 1 A1  
H 3 B3 2 A2 1 D1  
H 3 B4 2 A3 1 D2  
H 3 B5 2 A4 1 D3  
S 1 B6 3 A5 2 D4  
O 1 B7 7 A6 3 D5

B1 1.10928694  
B2 2.66752497  
B3 1.08972766  
B4 1.08951574  
B5 1.08968978  
B6 1.78533915  
B7 1.19741282  
A1 83.99787113  
A2 168.11037863  
A3 79.99077754  
A4 74.29827860  
A5 40.24512809  
A6 123.26151235  
D1 -18.73754102  
D2 120.09219308  
D3 -124.95246937  
D4 -179.51168128  
D5 179.63622268

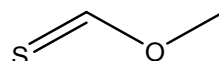

01  
C  
H 1 B1  
S 1 B2 2 A1

|   |   |    |   |    |   |    |
|---|---|----|---|----|---|----|
| O | 1 | B3 | 3 | A2 | 2 | D1 |
| C | 4 | B4 | 1 | A3 | 3 | D2 |
| H | 5 | B5 | 4 | A4 | 1 | D3 |
| H | 5 | B6 | 4 | A5 | 1 | D4 |
| H | 5 | B7 | 4 | A6 | 1 | D5 |

|    |              |
|----|--------------|
| B1 | 1.09486124   |
| B2 | 1.62211975   |
| B3 | 1.32986509   |
| B4 | 1.44065085   |
| B5 | 1.08714756   |
| B6 | 1.09271254   |
| B7 | 1.09271380   |
| A1 | 121.98021138 |
| A2 | 123.92793528 |
| A3 | 116.79357461 |
| A4 | 105.79494792 |
| A5 | 110.60733405 |
| A6 | 110.61301234 |
| D1 | 179.98458530 |
| D2 | 179.98329872 |
| D3 | 179.89769878 |
| D4 | -61.34272497 |
| D5 | 61.13490359  |

|    |               |
|----|---------------|
| D4 | -113.88031869 |
| D5 | 7.26130094    |
| D6 | 129.19552908  |
| D7 | 178.25716425  |
| D8 | 179.59082265  |

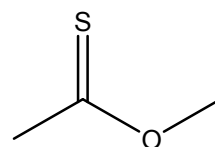

|   |   |     |   |    |   |
|---|---|-----|---|----|---|
| O | 1 | B1  |   |    |   |
| C |   |     |   |    |   |
| S | 1 | B1  |   |    |   |
| O | 1 | B2  | 2 | A1 |   |
| C | 3 | B3  | 1 | A2 | 2 |
| H | 4 | B4  | 3 | A3 | 1 |
| H | 4 | B5  | 3 | A4 | 1 |
| H | 4 | B6  | 3 | A5 | 1 |
| C | 1 | B7  | 3 | A6 | 4 |
| H | 8 | B8  | 1 | A7 | 3 |
| H | 8 | B9  | 1 | A8 | 3 |
| H | 8 | B10 | 1 | A9 | 3 |

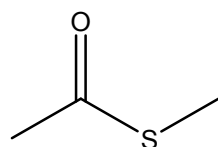

|   |   |     |    |    |   |
|---|---|-----|----|----|---|
| O | 1 |     |    |    |   |
| C |   |     |    |    |   |
| C | 1 | B1  |    |    |   |
| H | 2 | B2  | 1  | A1 |   |
| H | 2 | B3  | 1  | A2 | 3 |
| H | 2 | B4  | 1  | A3 | 4 |
| C | 1 | B5  | 2  | A4 | 5 |
| H | 6 | B6  | 1  | A5 | 2 |
| H | 6 | B7  | 1  | A6 | 2 |
| H | 6 | B8  | 1  | A7 | 2 |
| O | 1 | B9  | 6  | A8 | 2 |
| S | 1 | B10 | 10 | A9 | 6 |

|     |               |
|-----|---------------|
| B1  | 2.75329822    |
| B2  | 1.08967236    |
| B3  | 1.08859798    |
| B4  | 1.08844245    |
| B5  | 1.51414320    |
| B6  | 1.09309183    |
| B7  | 1.09042630    |
| B8  | 1.09213694    |
| B9  | 1.20454376    |
| B10 | 1.79766390    |
| A1  | 146.86172626  |
| A2  | 89.22986975   |
| A3  | 86.27886696   |
| A4  | 154.47907170  |
| A5  | 108.45391604  |
| A6  | 112.81944986  |
| A7  | 108.65359060  |
| A8  | 123.80933511  |
| A9  | 122.42115933  |
| D1  | 127.76306338  |
| D2  | 109.76691321  |
| D3  | -128.97656032 |

|     |               |
|-----|---------------|
| B1  | 1.64248402    |
| B2  | 1.33419965    |
| B3  | 1.43750535    |
| B4  | 1.08790395    |
| B5  | 1.09093864    |
| B6  | 1.09093811    |
| B7  | 1.50365228    |
| B8  | 1.09411877    |
| B9  | 1.09412267    |
| B10 | 1.08626253    |
| A1  | 125.30852503  |
| A2  | 119.65391701  |
| A3  | 104.98663321  |
| A4  | 110.31165211  |
| A5  | 110.31163101  |
| A6  | 109.62485553  |
| A7  | 109.50995654  |
| A8  | 109.50913332  |
| A9  | 110.81107565  |
| D1  | 0.00000000    |
| D2  | 179.99619657  |
| D3  | -60.34009553  |
| D4  | 60.33223174   |
| D5  | -180.00000000 |
| D6  | -58.64127751  |
| D7  | 58.63185440   |
| D8  | 179.99440243  |

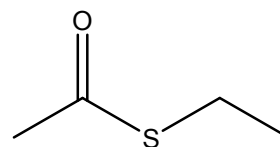

|   |   |    |   |    |   |
|---|---|----|---|----|---|
| O | 1 |    |   |    |   |
| C |   |    |   |    |   |
| H | 1 | B1 |   |    |   |
| H | 1 | B2 | 2 | A1 |   |
| H | 1 | B3 | 2 | A2 | 3 |
| C | 1 | B4 | 2 | A3 | 4 |
| H | 5 | B5 | 1 | A4 | 2 |



|   |    |     |   |     |   |     |
|---|----|-----|---|-----|---|-----|
| H | 5  | B6  | 1 | A5  | 2 | D4  |
| S | 5  | B7  | 1 | A6  | 2 | D5  |
| C | 8  | B8  | 5 | A7  | 1 | D6  |
| O | 9  | B9  | 8 | A8  | 5 | D7  |
| C | 9  | B10 | 8 | A9  | 5 | D8  |
| H | 11 | B11 | 9 | A10 | 8 | D9  |
| H | 11 | B12 | 9 | A11 | 8 | D10 |
| H | 11 | B13 | 9 | A12 | 8 | D11 |

|     |               |
|-----|---------------|
| B1  | 1.09089522    |
| B2  | 1.09224963    |
| B3  | 1.09461446    |
| B4  | 1.52563704    |
| B5  | 1.09172195    |
| B6  | 1.09048584    |
| B7  | 1.83226268    |
| B8  | 1.79984659    |
| B9  | 1.20507184    |
| B10 | 1.51414242    |
| B11 | 1.09357624    |
| B12 | 1.09037606    |
| B13 | 1.09168131    |
| A1  | 108.59397833  |
| A2  | 108.02269372  |
| A3  | 110.55578824  |
| A4  | 111.83022151  |
| A5  | 111.23531962  |
| A6  | 113.63925323  |
| A7  | 99.88432959   |
| A8  | 122.92527716  |
| A9  | 113.52319123  |
| A10 | 108.32216926  |
| A11 | 112.75605582  |
| A12 | 108.74781639  |
| D1  | 117.13455537  |
| D2  | 120.31258919  |
| D3  | -179.34406889 |
| D4  | -57.69901315  |
| D5  | 61.95733941   |
| D6  | -83.50223357  |
| D7  | -1.80796286   |
| D8  | 177.61896077  |
| D9  | -108.90015306 |
| D10 | 11.76959408   |
| D11 | 134.09866230  |

## Z-Matrices for Radicals

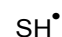

|    |            |    |  |  |  |
|----|------------|----|--|--|--|
| O2 |            |    |  |  |  |
| S  |            |    |  |  |  |
| H  | 1          | B1 |  |  |  |
| B1 | 1.34805900 |    |  |  |  |

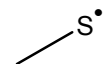

|    |   |    |   |    |   |
|----|---|----|---|----|---|
| O2 |   |    |   |    |   |
| S  |   |    |   |    |   |
| C  | 1 | B1 |   |    |   |
| H  | 2 | B2 | 1 | A1 |   |
| H  | 2 | B3 | 1 | A2 | 3 |
| H  | 2 | B4 | 1 | A3 | 4 |

|    |              |
|----|--------------|
| B1 | 1.80509576   |
| B2 | 1.09426097   |
| B3 | 1.09426071   |
| B4 | 1.08936108   |
| A1 | 108.46557032 |
| A2 | 108.46546693 |
| A3 | 112.72803708 |
| D1 | 115.62679808 |
| D2 | 122.18654500 |

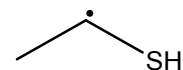

|    |   |    |   |    |   |
|----|---|----|---|----|---|
| O2 |   |    |   |    |   |
| S  |   |    |   |    |   |
| C  | 1 | B1 |   |    |   |
| H  | 2 | B2 | 1 | A1 |   |
| H  | 2 | B3 | 1 | A2 | 3 |
| C  | 2 | B4 | 1 | A3 | 4 |
| H  | 5 | B5 | 2 | A4 | 1 |
| H  | 5 | B6 | 2 | A5 | 1 |
| H  | 5 | B7 | 2 | A6 | 1 |

|    |               |
|----|---------------|
| B1 | 1.81255108    |
| B2 | 1.09664263    |
| B3 | 1.09673222    |
| B4 | 1.52576377    |
| B5 | 1.09500828    |
| B6 | 1.09200972    |
| B7 | 1.09200626    |
| A1 | 105.99738868  |
| A2 | 105.92913178  |
| A3 | 115.64533741  |
| A4 | 110.46961552  |
| A5 | 110.99351663  |
| A6 | 110.99466025  |
| D1 | 111.39208323  |
| D2 | 124.26821945  |
| D3 | -179.90021959 |
| D4 | -59.84034334  |
| D5 | 60.04987358   |

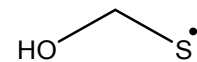

|    |  |
|----|--|
| O2 |  |
| C  |  |

|   |   |    |   |    |   |
|---|---|----|---|----|---|
| H | 1 | B1 |   |    |   |
| H | 1 | B2 | 2 | A1 |   |
| S | 1 | B3 | 2 | A2 | 3 |
| H | 1 | B4 | 4 | A3 | 3 |
| O | 1 | B5 | 4 | A4 | 3 |

|    |               |
|----|---------------|
| B1 | 1.09311270    |
| B2 | 1.10418734    |
| B3 | 1.80432166    |
| B4 | 1.93234767    |
| B5 | 1.40152428    |
| A1 | 107.00923608  |
| A2 | 108.65389903  |
| A3 | 95.89079776   |
| A4 | 116.85169040  |
| D1 | -111.51684524 |
| D2 | -104.96425419 |
| D3 | -124.91212420 |

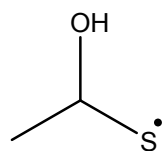

|    |   |    |   |    |   |
|----|---|----|---|----|---|
| O2 |   |    |   |    |   |
| C  |   |    |   |    |   |
| H  | 1 | B1 |   |    |   |
| S  | 1 | B2 | 2 | A1 |   |
| H  | 1 | B3 | 3 | A2 | 2 |
| O  | 1 | B4 | 3 | A3 | 2 |
| C  | 1 | B5 | 5 | A4 | 3 |
| H  | 6 | B6 | 1 | A5 | 5 |
| H  | 6 | B7 | 1 | A6 | 5 |
| H  | 6 | B8 | 1 | A7 | 5 |

|    |               |
|----|---------------|
| B1 | 1.10516701    |
| B2 | 1.82033617    |
| B3 | 1.93948424    |
| B4 | 1.40907052    |
| B5 | 1.52674909    |
| B6 | 1.08976380    |
| B7 | 1.09242484    |
| B8 | 1.09139813    |
| A1 | 101.58746116  |
| A2 | 92.09751648   |
| A3 | 114.41452446  |
| A4 | 107.42670124  |
| A5 | 111.02676659  |
| A6 | 108.65277919  |
| A7 | 110.13086487  |
| D1 | 102.00462725  |
| D2 | 119.74884160  |
| D3 | -126.36444999 |
| D4 | -174.35188631 |
| D5 | -53.94871313  |
| D6 | 64.46054301   |

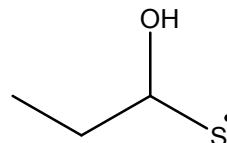

|    |  |
|----|--|
| O2 |  |
| O  |  |

|   |   |     |   |     |   |    |
|---|---|-----|---|-----|---|----|
| H | 1 | B1  |   |     |   |    |
| C | 1 | B2  | 2 | A1  |   |    |
| S | 3 | B3  | 1 | A2  | 2 | D1 |
| C | 3 | B4  | 1 | A3  | 4 | D2 |
| H | 5 | B5  | 3 | A4  | 1 | D3 |
| H | 5 | B6  | 3 | A5  | 1 | D4 |
| C | 5 | B7  | 3 | A6  | 1 | D5 |
| H | 8 | B8  | 5 | A7  | 3 | D6 |
| H | 8 | B9  | 5 | A8  | 3 | D7 |
| H | 8 | B10 | 5 | A9  | 3 | D8 |
| H | 3 | B11 | 1 | A10 | 5 | D9 |

|     |               |
|-----|---------------|
| B1  | 0.96287373    |
| B2  | 1.41030467    |
| B3  | 1.81965474    |
| B4  | 1.53363169    |
| B5  | 1.09255081    |
| B6  | 1.09509612    |
| B7  | 1.52994027    |
| B8  | 1.09245987    |
| B9  | 1.09101777    |
| B10 | 1.09425772    |
| B11 | 1.10622942    |
| A1  | 108.17732204  |
| A2  | 114.30372077  |
| A3  | 107.94996462  |
| A4  | 108.31165155  |
| A5  | 106.40379253  |
| A6  | 113.74442064  |
| A7  | 110.60354207  |
| A8  | 110.60075796  |
| A9  | 111.17425984  |
| A10 | 110.83139841  |
| D1  | -35.44395080  |
| D2  | -128.37936412 |
| D3  | -172.09316979 |
| D4  | -56.81572264  |
| D5  | 64.22507928   |
| D6  | -175.35633369 |
| D7  | -55.32572106  |
| D8  | 65.03202322   |
| D9  | -118.56273288 |

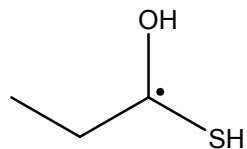

|    |   |     |   |     |   |    |
|----|---|-----|---|-----|---|----|
| O2 |   |     |   |     |   |    |
| C  |   |     |   |     |   |    |
| S  | 1 | B1  |   |     |   |    |
| H  | 1 | B2  | 2 | A1  |   |    |
| O  | 1 | B3  | 2 | A2  | 3 | D1 |
| H  | 2 | B4  | 1 | A3  | 4 | D2 |
| C  | 1 | B5  | 4 | A4  | 2 | D3 |
| H  | 6 | B6  | 1 | A5  | 4 | D4 |
| H  | 6 | B7  | 1 | A6  | 4 | D5 |
| C  | 6 | B8  | 1 | A7  | 4 | D6 |
| H  | 9 | B9  | 6 | A8  | 1 | D7 |
| H  | 9 | B10 | 6 | A9  | 1 | D8 |
| H  | 9 | B11 | 6 | A10 | 1 | D9 |

|    |            |
|----|------------|
| B1 | 1.75965920 |
| B2 | 1.90549204 |
| B3 | 1.36854001 |

|     |              |
|-----|--------------|
| B4  | 1.36335363   |
| B5  | 1.49506567   |
| B6  | 1.09589433   |
| B7  | 1.09212416   |
| B8  | 1.54320152   |
| B9  | 1.09213059   |
| B10 | 1.09314338   |
| B11 | 1.09338828   |
| A1  | 90.82784207  |
| A2  | 118.27894753 |
| A3  | 101.06512633 |
| A4  | 113.81308483 |
| A5  | 107.77239152 |
| A6  | 108.72197502 |
| A7  | 113.74015213 |
| A8  | 110.57572707 |
| A9  | 110.56979349 |
| A10 | 111.10904662 |
| D1  | -8.93359654  |
| D2  | 74.21533050  |
| D3  | 157.78531283 |
| D4  | 48.08335058  |
| D5  | 164.23880239 |
| D6  | -73.01006545 |
| D7  | 57.80350341  |
| D8  | 177.72340540 |
| D9  | -62.54702647 |

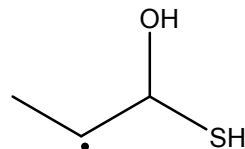

|    |   |     |   |     |   |    |
|----|---|-----|---|-----|---|----|
| O2 |   |     |   |     |   |    |
| C  |   |     |   |     |   |    |
| S  | 1 | B1  |   |     |   |    |
| H  | 1 | B2  | 2 | A1  |   |    |
| O  | 1 | B3  | 3 | A2  | 2 | D1 |
| H  | 3 | B4  | 3 | A3  | 2 | D2 |
| C  | 1 | B5  | 1 | A4  | 5 | D3 |
| H  | 7 | B6  | 5 | A5  | 3 | D4 |
| H  | 7 | B7  | 1 | A6  | 5 | D5 |
| C  | 7 | B8  | 1 | A7  | 5 | D6 |
| H  | 9 | B9  | 7 | A8  | 1 | D7 |
| H  | 9 | B10 | 7 | A9  | 1 | D8 |
| H  | 9 | B11 | 7 | A10 | 1 | D9 |

|     |              |
|-----|--------------|
| B1  | 1.09651509   |
| B2  | 1.92971600   |
| B3  | 1.92786065   |
| B4  | 1.40080777   |
| B5  | 1.34405244   |
| B6  | 1.46779444   |
| B7  | 1.08381588   |
| B8  | 1.48866792   |
| B9  | 1.09089885   |
| B10 | 1.10242750   |
| B11 | 1.09343151   |
| A1  | 99.79478914  |
| A2  | 89.95268401  |
| A3  | 110.59661434 |
| A4  | 95.13598490  |
| A5  | 111.00814141 |
| A6  | 116.17757267 |
| A7  | 122.85609902 |

|     |               |
|-----|---------------|
| A8  | 111.22952465  |
| A9  | 111.92710770  |
| A10 | 110.86619833  |
| D1  | 98.80189333   |
| D2  | 118.73945357  |
| D3  | -65.23718839  |
| D4  | -123.74529842 |
| D5  | -162.83679645 |
| D6  | 30.47561147   |
| D7  | -33.20694160  |
| D8  | 86.76406766   |
| D9  | -154.68969690 |

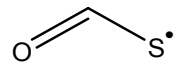

|    |   |    |   |    |    |
|----|---|----|---|----|----|
| O2 |   |    |   |    |    |
| C  |   |    |   |    |    |
| H  | 1 | B1 |   |    |    |
| O  | 1 | B2 | 2 | A1 |    |
| S  | 1 | B3 | 3 | A2 | 2  |
|    |   |    |   |    | D1 |

|    |              |
|----|--------------|
| B1 | 1.10305555   |
| B2 | 1.20344910   |
| B3 | 1.77015761   |
| A1 | 124.75942846 |
| A2 | 119.12039378 |
| D1 | 180.00000000 |

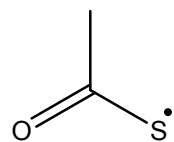

|    |   |    |   |    |    |
|----|---|----|---|----|----|
| O2 |   |    |   |    |    |
| C  |   |    |   |    |    |
| S  | 1 | B1 |   |    |    |
| O  | 1 | B2 | 2 | A1 |    |
| C  | 1 | B3 | 3 | A2 | 2  |
| H  | 4 | B4 | 1 | A3 | 3  |
| H  | 4 | B5 | 1 | A4 | 3  |
| H  | 4 | B6 | 1 | A5 | 3  |
|    |   |    |   |    | D1 |
|    |   |    |   |    | D2 |
|    |   |    |   |    | D3 |
|    |   |    |   |    | D4 |

|    |               |
|----|---------------|
| B1 | 1.76710483    |
| B2 | 1.21182675    |
| B3 | 1.50171056    |
| B4 | 1.09300517    |
| B5 | 1.09300810    |
| B6 | 1.09082047    |
| A1 | 114.19303286  |
| A2 | 125.24702100  |
| A3 | 109.80874420  |
| A4 | 109.80654648  |
| A5 | 109.53195883  |
| D1 | 179.99678040  |
| D2 | 120.78258115  |
| D3 | -120.75664928 |
| D4 | 0.01171873    |
